## **Distinct and sequential re-replication barriers ensure precise genome duplication**

Yizhuo Zhou<sup>1§</sup>, Pedro N. Pozo<sup>2§</sup>, Seeun Oh<sup>3</sup>, Haley M. Stone<sup>1</sup>, Jeanette Gowen Cook<sup>1,2,4\*</sup>

§ Equal contributions

<sup>1</sup>Department of Biochemistry and Biophysics, The University of North Carolina at Chapel Hill, Chapel Hill, North Carolina 27599, USA

<sup>2</sup>Curriculum in Genetics and Molecular Biology, The University of North Carolina at Chapel Hill, Chapel Hill, NC 27599, USA;

<sup>3</sup>F. Widjaja Foundation Inflammatory Bowel and Immunobiology Research Institute and the Research Division of Immunology, Department of Biomedical Sciences, Cedars-Sinai Medical Center, Los Angeles, CA 90048, USA.

<sup>4</sup>Lineberger Comprehensive Cancer, The University of North Carolina at Chapel Hill, Chapel Hill, NC 27599, USA

\*Correspondence to ([jean\\_cook@med.unc.edu](mailto:jean_cook@med.unc.edu))

**Short title:** Late cell cycle phase Cdt1 hyperphosphorylation ensures precise genome duplication

### **Keywords:**

cell division cycle, cyclin-dependent kinase, genome stability, DNA replication origin licensing, re-replication, MCM, Cdt1, cyclin, protein phosphorylation, single cell analyses, protein-protein interaction

1 **Abstract**

2 Achieving complete and precise genome duplication requires that each genomic  
3 segment be replicated only once per cell division cycle. Protecting large eukaryotic  
4 genomes from re-replication requires an overlapping set of molecular mechanisms that  
5 prevent the first DNA replication step, the DNA loading of MCM helicase complexes to  
6 license replication origins. Previous reports have defined many such origin licensing  
7 inhibition mechanisms, but the temporal relationships among them are not clear,  
8 particularly with respect to preventing re-replication in G2 and M phases. Using a  
9 combination of mutagenesis, biochemistry, and single cell analyses in human cells, we  
10 define a new mechanism that prevents re-replication through hyperphosphorylation of  
11 the essential MCM loading protein, Cdt1. We demonstrate that Cyclin A/CDK1  
12 hyperphosphorylates Cdt1 to inhibit MCM re-loading in G2 phase. The mechanism of  
13 inhibition is to block Cdt1 binding to MCM independently of other known Cdt1  
14 inactivation mechanisms such as Cdt1 degradation during S phase or Geminin binding.  
15 Moreover, we provide evidence that protein phosphatase 1-dependent Cdt1  
16 dephosphorylation at the mitosis-to-G1 phase transition re-activates Cdt1. We propose  
17 that multiple distinct, non-redundant licensing inhibition mechanisms act in a series of  
18 sequential relays through each cell cycle phase to ensure precise genome duplication.

19 **Author Summary**

20 The initial step of DNA replication is loading the DNA helicase, MCM, onto DNA during  
21 the first phase of the cell division cycle. If MCM loading occurs inappropriately onto DNA  
22 that has already been replicated, then cells risk DNA re-replication, a source of  
23 endogenous DNA damage and genome instability. How mammalian cells prevent any  
24 sections of their very large genomes from re-replicating is still not fully understood. We  
25 found that the Cdt1 protein, one of the critical MCM loading factors, is inhibited  
26 specifically in late cell cycle stages through a mechanism involving protein  
27 phosphorylation. This phosphorylation prevents Cdt1 from binding MCM; when Cdt1  
28 can't be phosphorylated MCM is inappropriately re-loaded onto DNA and cells are prone  
29 to re-replication. When cells divide and transition into G1 phase, Cdt1 is then  
30 dephosphorylated to re-activate it for MCM loading. Based on these findings we assert  
31 that the different mechanisms that cooperate to avoid re-replication are not redundant,  
32 but rather distinct mechanisms are dominant in different cell cycle phases. These  
33 findings have implications for understanding how genomes are duplicated precisely once

34 per cell cycle and shed light on how that process is perturbed by changes in Cdt1 levels  
35 or phosphorylation activity.

## 36 **Introduction**

37 During normal cell proliferation DNA replication must be completed precisely once  
38 per cell cycle. A prerequisite for DNA replication in eukaryotic cells is the DNA loading of  
39 the core of the replicative helicase, the minichromosome maintenance complex (MCM).  
40 The process of MCM loading is known as DNA replication origin licensing, and it is  
41 normally restricted to the G1 cell cycle phase [1-3]. In proliferating mammalian cells,  
42 hundreds of thousands of replication origins are licensed in G1, then a subset of these  
43 origins initiate replication in S phase. To achieve precise genome duplication, no origin  
44 should initiate more than once per cell cycle, and preventing re-initiation is achieved by  
45 preventing re-licensing [4-7]. Improper re-licensing in S, G2, or M phases leads to re-  
46 initiation and re-replication, a source of DNA damage and genome instability that can  
47 promote cell death or oncogenesis (reviewed in [7-10]).

48 Re-licensing is prevented by an extensive collection of mechanisms that inhibit the  
49 proteins required to load MCM. In vertebrates, multiple transcriptional and post-  
50 transcriptional mechanisms target each of the individual licensing components that load  
51 MCM complexes: the origin recognition complex (ORC), the Cdc6 (cell division cycle 6),  
52 and Cdt1 (Cdc10-dependent transcript 1) proteins as well as MCM subunits themselves  
53 are all inactivated for licensing outside of G1 phase (reviewed in [1, 3, 7, 11-14]). These  
54 mechanisms include regulation of licensing components' synthesis, subcellular  
55 localization, chromatin association, protein-protein interactions, and degradation. In  
56 addition, cell cycle-dependent changes in chromatin structure contribute to licensing  
57 control [15]. Why have mammals evolved so very many distinct molecular mechanisms  
58 to prevent re-replication? Are each of these mechanisms *redundant* with one another, or  
59 do they operate in a *temporal series* coupled to cell cycle progression? In this study we  
60 investigated potential differences between re-replication control *during* S phase and re-  
61 replication control *after* S phase ends. We considered that licensing control in late S  
62 phase and G2 phase is particularly important because the genome has been fully  
63 replicated by this time, and thus G2 cells have the highest amount of available DNA  
64 substrate for re-replication.

65 We were inspired to explore the notion of sequential re-replication control by studies  
66 of mammalian Cdt1. One of the well-known mechanisms to avoid re-replication in

67 mammalian cells is degradation of Cdt1 during S phase. Beginning in late S phase  
68 however, Cdt1 re-accumulates and reaches levels during G2 phase similar to its levels  
69 in G1 phase when Cdt1 is fully active to promote MCM loading [16-21]. One mechanism  
70 to restrain Cdt1 activity in G2 is binding to a dedicated inhibitor protein, Geminin, which  
71 interferes with Cdt1-MCM binding [22-24]. Interestingly, mammalian Cdt1 is  
72 hyperphosphorylated in G2 phase relative to Cdt1 in G1 phase [16, 17], but the  
73 consequences of those phosphorylations are largely unknown. Here, we elucidated a  
74 novel phosphorylation-dependent mechanism that inhibits Cdt1 licensing activity in G2  
75 and M phase rather than inducing Cdt1 degradation to ensure precise genome  
76 duplication. We propose that multiple re-licensing inhibition mechanisms are not  
77 redundant, but rather act in a sequential relay from early S phase (replication-coupled  
78 destruction) through mid-S phase (degradation plus geminin) to G2 and M phase  
79 (geminin plus Cdt1 hyperphosphorylation) to achieve stringent protection from re-  
80 replication for mammalian genomes.

81

## 82 **Results**

### 83 **Cdt1 phosphorylation inhibits DNA re-replication.**

84 Mammalian Cdt1 is phosphorylated in G2 phase and mitosis [17, 19, 20], and we  
85 hypothesized that this phosphorylation contributes to blocking re-replication by directly  
86 inhibiting Cdt1 licensing activity. To test that hypothesis, we generated mutations in  
87 candidate phosphorylation sites illustrated in Fig. 1A. We first compared the activity of  
88 normal Cdt1 (wild-type, WT) to a previously-described Cdt1 variant, “Cdt1-5A” bearing  
89 mutations at five phosphorylation sites. We had shown that this variant, “Cdt1-5A”  
90 (S391A, T402A, T406A, S411A, and S491A) is both unphosphorylatable *in vitro* by  
91 stress-induced MAP kinases and compromised for G2 hyperphosphorylation detected by  
92 gel mobility shift [17]. Four of the five sites are in a region of low sequence conservation  
93 and high-predicted intrinsic disorder [25](Fig. 1A and Supplementary Fig. S1). This  
94 “linker” region connects the two winged-helix domains of Cdt1 that have been  
95 characterized for MCM binding (C-terminal “C domain”) [26] or for binding to the inhibitor  
96 Geminin (middle “M domain”) [27]. Both domains are required for metazoan licensing  
97 activity [28-32]. We inserted cDNAs encoding either wild-type Cdt1 (Cdt1-WT) or Cdt1-  
98 5A into a single chromosomal FRT recombination site under doxycycline-inducible

99 expression control in the U2OS cell line. All Cdt1 constructs bear C-terminal HA epitope  
100 and polyhistidine tags to distinguish ectopic Cdt1 from endogenous Cdt1.

101 As a measure of relative Cdt1 activity, we induced Cdt1 production to approximately  
102 5-10 times higher levels than endogenous Cdt1 in asynchronously proliferating cells over  
103 the course of 48 hrs (Fig. 1D, compare lanes 1 and 2). The amount of re-replication  
104 induced by Cdt1 overproduction is directly related to Cdt1 licensing activity [30]. As  
105 previously reported [33, 34], Cdt1-WT overproduction in human cells induced some re-  
106 replication, which we detected by analytical flow cytometry as a population of cells with  
107 DNA content greater than the normal G2 amount (>4C, Fig. 1B and 1C, and  
108 Supplementary Figure S2A). Strikingly however, overproducing Cdt1-5A (Fig. 1D, lane  
109 5) induced substantially more re-replication suggesting that this variant is intrinsically  
110 more active (Fig 1B and 1C). DNA re-replication can also induce the formation of giant  
111 nuclei [35, 36], and we noted that the average nuclear area of cells overproducing Cdt1-  
112 WT was somewhat larger than control nuclei, whereas nuclei of cells overproducing  
113 Cdt1-5A were even larger (Supplementary Fig. S2A). Thus, Cdt1-5A expression not only  
114 induces more cells to re-replicate, but it also induces a higher degree of re-replication in  
115 those individual cells compared to Cdt1-WT expression.

116 Re-replication is an aberrant genotoxic phenomenon characterized by molecular  
117 markers of DNA damage (reviewed in [1, 7, 14]). As an additional measure of re-  
118 replication, we analyzed lysates of Cdt1-overproducing cells for Chk1 phosphorylation, a  
119 marker of the cellular DNA damage response. Cdt1-5A consistently induced more Chk1  
120 phosphorylation than WT Cdt1 (Fig. 1E, compare lanes 2 and 3). Moreover, cells  
121 overproducing Cdt1-5A were also ~3 times more likely to generate  $\gamma$ -H2AX foci, another  
122 marker of re-replication-associated DNA damage [37] (Supplementary Fig. S2B). We  
123 also noted that the accumulation of re-replicated cells came at the expense of G1 cells,  
124 consistent with a scenario in which re-replication during S or G2 induced a DNA damage  
125 response and a G2 checkpoint cell cycle arrest (Supplementary Fig. S3).

126 Phosphorylation at two additional candidate CDK/MAPK target sites in the linker  
127 region has been detected in global phosphoproteomics analyses [38]. To test the  
128 potential additional contribution of these sites to Cdt1 regulation, we included the  
129 mutations S372A and S394A to Cdt1-5A to create Cdt1-7A (Fig. 1A). Cdt1-7A  
130 overproduction did not induce more re-replication or DNA damage than Cdt1-5A (Fig. 1B  
131 and 1C,  $p>0.05$ , Fig. 1E, lane 4). From this observation, we infer that Cdt1-5A is already

132 at the maximal deregulation that is achievable from phosphorylation in the linker region,  
133 and that additional phosphorylations do not further affect activity. (Of note, the y-axis  
134 values of re-replicating cells varies among different mutants and reflects snapshots of  
135 the rates of DNA synthesis in the final 30 minutes of Cdt1 expression.) To assess the  
136 importance of the four sites in the linker relative to the single site in the C-terminal  
137 domain, we generated Cdt1-4A and Cdt1-S491A (Fig. 1A). Cdt1-4A was as active as  
138 Cdt1-5A for inducing re-replication, whereas Cdt1-S491A only induced as much re-  
139 replication as Cdt1-WT (Fig. 1B and 1C). Like Cdt1-5A, Cdt1-4A induced substantially  
140 more DNA damage (phospho-Chk1) than Cdt1-WT (Fig. 1E, lanes 8 and 10). Thus,  
141 linker region phosphorylation inhibits Cdt1 activity.

142 Cdt1 is also phosphorylated at both T29 and S31 [19, 38] (see also Fig. 1A). CDK-  
143 dependent phosphorylation at T29 generates a binding site for the SCF<sup>Skp2</sup> E3 ubiquitin  
144 ligase, which contributes to Cdt1 degradation during S phase [34, 39, 40]. The stress  
145 MAPK JNK (c-Jun N-terminal kinase) has also been reported to inhibit Cdt1 by  
146 phosphorylating T29 [41]. To determine if these N-terminal phosphorylations collaborate  
147 with linker region phosphorylations, we added the two mutations, T29A and S31A, to  
148 Cdt1-7A to generate Cdt1-9A. Cdt1-9A overproduction induced somewhat more re-  
149 replication than the three Cdt1 variants bearing only linker region mutations, Cdt1-4A,  
150 5A, and 7A (Fig. 1B and 1C), and Cdt1-9A induced similar amounts of DNA damage  
151 checkpoint activation as these three linker variants (pChk1, Fig. 1E lanes 5 and 11). As  
152 an additional test, we included in our analysis a Cdt1 variant with a previously-  
153 characterized mutation in the cyclin binding motif, Cdt1-Cy (RRL to AAA at positions 66-  
154 68, Fig. 1A) [40]. We expect that this alteration compromises phosphorylation at most/all  
155 CDK-dependent phosphorylation sites. As we had noted in a previous study [28], Cdt1-  
156 Cy sometimes accumulated to higher levels than Cdt1-WT, particularly after longer  
157 induction times (e.g. Fig. 1E, lane 6), and this variant induced the highest amount of both  
158 re-replication and Chk1 phosphorylation (Fig. 1B,1C, and 1E). We presume that higher  
159 Cdt1-Cy stability contributes to enhanced re-replication activity, but this effect must be  
160 independent of phosphorylation at T29 and S31 since Cdt1-Cy is more stable and more  
161 active than both Cdt1-9A and a previously-tested Cdt1 mutant “2A” [28].

## 162 **Cdt1 phosphorylation prevents MCM re-loading in G2 cells.**

163 Re-replication requires that MCM be loaded back onto DNA that has already been  
164 duplicated followed by a second round of initiation. We sought to determine when during

165 the cell cycle the mutations that de-regulate Cdt1 activity induce MCM-reloading. For this  
166 test, we used an analytical flow cytometry assay that detects only bound MCM because  
167 we extract soluble MCM with detergent prior to fixing and anti-MCM staining [42, 43]. We  
168 focused on two of the Cdt1 variants, Cdt1-4A because it represents a fully de-regulated  
169 linker, and Cdt1-Cy which induced the most re-replication after 48 hours of expression  
170 (Fig. 1). In asynchronously proliferating cultures, we induced Cdt1 for 24 hours which is  
171 slightly more than one full cell cycle in these U2OS cells to allow all cells to pass through  
172 each cell cycle phase. Particularly because Cdt1-Cy accumulates faster than Cdt1-WT  
173 over time, we analyzed expression shortly after doxycycline induction (Fig. 2A). At this  
174 early time point, all three forms of ectopic Cdt1 (WT, 4A, and Cy) were produced at  
175 similar amounts (Fig. 2B.). We then subjected these parallel cultures to analysis of DNA  
176 content to indicate cell cycle phase (x-axes) and MCM loading (y-axes) (Fig. 2C). In  
177 control cells, MCM is rapidly loaded in G1 and then progressively removed throughout S  
178 phase (illustrated in Fig. 2C). Overproducing normal Cdt1 (“WT”) for 24 hours had only  
179 minimal impact on this pattern. In contrast to Cdt1-WT, both the Cdt1-4A and Cdt1-Cy  
180 variants induced a striking “spike” of MCM loading in cells with 4C DNA content (i.e. G2  
181 phase) (Fig. 2C and 2D). Of note, we did not detect aberrant MCM loading in either G1  
182 or S phase cells. We had previously established that linker phosphorylations do not  
183 impair Cdt1 degradation during S phase [17], so we interpret these results as MCM re-  
184 loading only after S phase is complete. Since these cells only overproduced Cdt1 for one  
185 cell cycle we also conclude that re-loading occurs within a single cell cycle.

186 We had previously shown that normal Cdt1 from lysates of nocodazole-arrested  
187 (early mitotic) HeLa cells typically migrated slower than Cdt1-5A by standard SDS-PAGE  
188 [17]; we made similar observations in U2OS cells synchronized by S phase arrest then  
189 release into nocodazole (synchronization and expression strategy in Fig. 3A; Cdt1  
190 migration by standard SDS-PAGE in Fig. 3B, middle panel lanes 2 and 5). As a more  
191 quantitative and consistent measure of Cdt1 phosphorylation, we analyzed Cdt1  
192 migration in the presence of Phos-tag reagent which retards protein mobility proportional  
193 to the extent of phosphorylation [44]. HA-Cdt1 from nocodazole-arrested cells is a  
194 mixture of slow-migrating species on Phos-tag gels compared to HA-Cdt1 from G1 cells,  
195 and this migration was accelerated by phosphatase treatment of the lysates *in vitro* prior  
196 to electrophoresis (Supplementary Fig. S4A). The distribution of ectopic Cdt1-5A bands  
197 was lower than Cdt1-WT bands on Phos-tag gels (Fig. 3B, lanes 2 and 5),  
198 demonstrating that these sites are among the sites phosphorylated late in the cell cycle.

199 Compared to Cdt1-5A, the Cdt1-7A variant had only slightly shifted distribution  
200 towards faster migration on Phos-tag gels (Fig. 3B, compare lanes 5 and 6). Cdt1-4A  
201 and the Cdt1-Cy mutant migrated on Phos-tag gels with a pattern very similar to Cdt1-5A  
202 whereas Cdt1-S491A migration was indistinguishable from Cdt1-WT (Fig. 3B, lanes 2-5  
203 and 8). Cdt1-9A from synchronized cells migrated even faster than Cdt1-7A on Phos-tag  
204 gels, demonstrating that one or both T29 and S31 are also phosphorylated after S  
205 phase. Moreover, the difference in migration between Cdt1-9A and Cdt1-Cy suggests  
206 that either some residual kinase binding remains in the Cy motif mutant or that non-Cy-  
207 dependent kinases can phosphorylate some of the sites mutated in Cdt1-9A. These  
208 patterns indicate that Cdt1 is multiply phosphorylated late in the cell cycle on a collection  
209 of sites that includes both the N-terminal CDK sites and importantly, the set of linker  
210 phosphorylation sites that inhibit Cdt1 activity and restrict re-replication.

### 211 **Cyclin A/CDK1 is the primary Cdt1 kinase during G2 and M phases.**

212 To determine which kinase(s) is responsible for Cdt1 phosphorylation, we assessed  
213 the effects of kinase inhibitors. As a first step, we analyzed the migration of *endogenous*  
214 Cdt1 on Phos-tag gels using lysates from asynchronously proliferating or synchronized  
215 cells. Cdt1 from asynchronous cells migrates primarily as two bands on Phos-tag gels,  
216 and both forms are absent from lysates of UV-irradiated cells. Cdt1 is degraded during  
217 repair of UV-induced damage [45-48], so we conclude that both bands are endogenous  
218 Cdt1. Endogenous Cdt1 in nocodazole-synchronized cells migrated as a tight set of very  
219 slow-migrating species that are converted to the two faster forms by phosphatases *in*  
220 *vitro* prior to gel electrophoresis (Supplementary Fig S4A, lanes 3 and 4).

221 We then synchronized cells in nocodazole to induce maximal Cdt1 phosphorylation  
222 and tested the effects of pharmacological kinase inhibitors on the migration of  
223 endogenous Cdt1 using Phos-tag gels. All nine of the sites we had altered are predicted  
224 to be potential targets of both CDKs and MAPKs since all nine are serine or threonine  
225 followed by proline [49-52](Supplementary Fig. S1). Both kinase classes are active in G2  
226 [53-55], so we postulated that during normal G2 and M phases these Cdt1 sites are  
227 phosphorylated by CDK and/or MAPK. In addition to the kinase inhibitors, we also co-  
228 treated with the proteasome inhibitor MG132 to prevent cyclin or other ubiquitin-  
229 mediated protein degradation. We first treated nocodazole-arrested cells with inhibitors  
230 of p38 or JNK, two stress-activated MAP kinases which we previously showed can  
231 phosphorylate the linker region during a stress response [17] (p38 inhibitor SB203580



232 and c-Jun N-terminal kinase JNK inhibitor VIII). These MAPK inhibitors, either alone or in  
233 combination, had no effect on mitotic Cdt1 migration on Phos-tag gels (Fig. 3C, lanes 5-  
234 7, compared to lane 1). We confirmed that the inhibitors were active in these cells at  
235 these concentrations by analyzing known downstream substrates (Supplementary Fig.  
236 S4B-D) [17, 56, 57]. We also tested inhibitors of CDK1 and CDK2 singly or in  
237 combination. In contrast to the effects of MAPK inhibitors, the slow migration of  
238 phospho-Cdt1 was largely reversed by treatment with CDK1 inhibitor RO-3306 [58] for  
239 just 15 minutes (Fig. 3C, compare lanes 2 and 4 to lane 1, treatment was shorter to  
240 preserve mitotic cell morphology), but not when treated with the CDK2 inhibitor CVT313  
241 for an hour, (Fig. 3C, lane 3).

242 CDK1 is normally activated by either Cyclin A or Cyclin B, and we next sought to  
243 identify which cyclin is responsible for directing CDK1 to phosphorylate Cdt1. We  
244 therefore took advantage of the polyhistidine tag at the C-terminus of the Cdt1-WT  
245 construct to retrieve Cdt1 from lysates of transiently transfected, nocodazole-arrested  
246 cells. As a control, we included the Cdt1-Cy variant with a disrupted cyclin binding motif  
247 [40]. We analyzed Cdt1-bound proteins from these lysates for the presence of  
248 endogenous cyclin and CDK subunits. Cdt1-WT interacted with both CDK1 and CDK2,  
249 and strongly interacted with Cyclin A, but not at all with either Cyclin B or Cyclin E (Fig.  
250 4A). Cdt1-Cy retrieved no cyclins or CDKs, indicating that the only strong CDK binding  
251 site in Cdt1 is the RRL at positions 66-68. Since Cdt1 binds Cyclin A, CDK1, and CDK2,  
252 but inhibiting CDK1 and not CDK2 affected Cdt1 phosphorylation in nocodazole-  
253 arrested, we conclude that Cyclin A/CDK1 is responsible for the inactivating Cdt1  
254 phosphorylations during G2 and M phases. Cyclin A/CDK2 also binds Cdt1 and  
255 contributes to Cdt1 degradation during S phase [34, 39, 40], but our results indicate that  
256 in nocodazole-arrested cells, CDK2 activity is not required for Cdt1 phosphorylation.

257 To determine if Cyclin A/CDK1 can directly phosphorylate Cdt1, we incubated Cdt1  
258 that had been partially purified from transfected cells with purified Cyclin A/CDK1 and [ $\gamma$ -  
259  $^{32}$ P]-ATP. Cdt1 was directly phosphorylated *in vitro* by Cyclin A/CDK1, and this  
260 phosphorylation was blocked by the general CDK1/CDK2 inhibitor, roscovitine (Fig. 4B,  
261 lanes 1 and 2). However, this assay does not distinguish between phosphorylation at the  
262 previously studied N-terminal CDK target sites, T29 and S31, and sites in the linker  
263 region or elsewhere. To test specifically for linker region phosphorylations, we repeated  
264 the *in vitro* kinase reactions in the presence of unlabeled ATP and then subjected the

265 reactions to immunoprecipitation with a phospho-specific antibody raised against Cdt1  
266 sites S402, S406 and T411. We had previously described this antibody as being suitable  
267 for immunoprecipitation (though not for immunoblotting) [17]. Two different test sera from  
268 that antibody production detect Cdt1 phosphorylation by immunoprecipitation followed by  
269 immunoblotting with a general Cdt1 antibody; these sera are labelled Ab<sub>3</sub> and Ab<sub>4</sub>. By  
270 this method, we detected direct Cyclin A/CDK1-mediated Cdt1 phosphorylation at the  
271 inhibitory linker sites *in vitro* (Fig. 4C, lanes 4 and 6).

## 272 **Cdt1 phosphorylation blocks MCM binding.**

273 We next explored the molecular mechanism of Cyclin A/CDK1-mediated Cdt1  
274 licensing inhibition. The inhibitory phosphorylation sites are not visible in any currently  
275 available Cdt1 atomic structures. Nonetheless, our homology model of the human Cdt1-  
276 MCM complex ([28] and Fig. 5A) led us to speculate that phosphorylation-induced  
277 changes at this linker could affect MCM binding. We first compared the MCM binding  
278 ability of Cdt1-WT to the Cdt1-Cy variant that cannot bind Cyclin A/CDK1. We transiently  
279 transfected cells with these plasmids and then immunoprecipitated MCM2 from  
280 asynchronously growing cells or from cells arrested in nocodazole. MCM6 serves as a  
281 marker of the MCM complex retrieved by the MCM2 immunoprecipitation.  
282 Asynchronously growing cells spend more time in G1 than in G2 and have mostly  
283 hypophosphorylated Cdt1. Thus as expected, there was little difference in MCM binding  
284 ability between Cdt1-WT and Cdt1-Cy in asynchronous cells (Fig. 5B, lanes 6 and 7). In  
285 contrast, in nocodazole-arrested cells where Cdt1-WT was hyperphosphorylated, but  
286 Cdt1-Cy was less phosphorylated, the Cdt1-Cy variant bound MCM significantly better  
287 than Cdt1-WT (Fig. 5B, lanes 9 and 10). This difference in binding was independent of  
288 the presence of high Geminin levels in mitotic cells (Fig. 5B, lanes 3 and 4) which is also  
289 known to affect Cdt1-MCM binding [22, 23] .

290 We then set out to test if MCM interacts with hyperphosphorylated G2 Cdt1 less well  
291 than with hypophosphorylated G1 Cdt1 (i.e. if phosphorylation impairs Cdt1-MCM  
292 binding). We noted however that simply comparing co-immunoprecipitations from lysates  
293 of G1 and G2 phase cells is complicated by the presence of the Cdt1 inhibitor, Geminin,  
294 which interferes with the Cdt1-MCM interaction and is only present in S and G2 cells.  
295 Because Geminin is differentially expressed in G1 and G2 cells, the comparison would  
296 not be fair. To account for the effects of Geminin, we prepared a lysate of  
297 asynchronously-proliferating, mostly G1 cells, then mixed this lysate with lysate from

298 nocodazole-arrested cells that contains both Geminin and hyperphosphorylated Cdt1  
299 (Fig. 5C, lane 3 input). In this way, we created a similar opportunity for MCM to bind  
300 either hyper- or hypophosphorylated Cdt1. We then immunoprecipitated endogenous  
301 MCM2 and probed for MCM6 as a marker of the MCM complex and for Cdt1. For  
302 comparison, we immunoprecipitated MCM2 from an unmixed lysate of nocodazole-  
303 arrested cells with only hyperphosphorylated Cdt1. As expected, Geminin did not co-  
304 precipitate with MCM since the Cdt1-Geminin and Cdt1-MCM interactions are mutually  
305 exclusive (Fig. 5C). Importantly, we found that Cdt1 bound by the MCM complex in the  
306 mixed lysates was enriched for the faster migrating hypophosphorylated Cdt1 relative to  
307 hyperphosphorylated Cdt1. Moreover, the total amount of Cdt1 bound to MCM was  
308 much higher when hypophosphorylated Cdt1 was available than when the only form of  
309 Cdt1 was hyperphosphorylated (Fig. 5C, compare lanes 5 and 6). This preferential  
310 binding suggests that Cdt1 phosphorylation disrupts interaction with the MCM complex,  
311 and that this disruption contributes to re-replication inhibition in G2 and M phases. We  
312 note that this is the first example of direct regulation of the Cdt1-MCM interaction by  
313 post-translational modification.

#### 314 **Cdt1 dephosphorylation at the M-G1 transition requires PP1 phosphatase activity.**

315 Our finding that Cdt1 phosphorylation in G2 and M phase inhibits its ability to bind  
316 MCM suggests that Cdt1 must be dephosphorylated in the subsequent G1 phase to  
317 restore its normal function. To explore this notion, we first monitored Cdt1 expression  
318 and phosphorylation in cells progressing from M phase into G1. We released  
319 nocodazole-arrested cells and collected time points for analysis by immunoblotting (Fig.  
320 6A). Like the mitotic cyclins, Geminin is a substrate of the Anaphase Promoting  
321 Complex/Cyclosome (APC/C) [59], and as expected for an APC/C substrate, Geminin  
322 was degraded within 60 minutes of mitotic release. In contrast, Cdt1 was not degraded  
323 during the M-G1 transition but rather, was rapidly dephosphorylated coincident with  
324 Geminin degradation (Fig. 6A, compare lanes 3 and 4). We next investigated which  
325 phosphatase is required for Cdt1 dephosphorylation. We first tested phosphatase  
326 inhibitors for the ability to prevent Cdt1 dephosphorylation after CDK1 inhibition. We  
327 tested inhibitors of protein phosphatase 1 (PP1) and protein phosphatase 2A (PP2A),  
328 and these two families account for the majority of protein dephosphorylation in cells [60].  
329 We treated nocodazole-arrested cells with the CDK1 inhibitor to induce Cdt1  
330 dephosphorylation in the presence or absence of calyculin A (Cal A) or okadaic acid

331 (OA) [61]. Both compounds are potent inhibitors of both PP1 and PP2A, but calyculin A  
332 is more effective than okadaic acid for inhibiting PP1, particularly at the concentrations  
333 we tested [62]. We found that calyculin A preserved Cdt1 hyperphosphorylation (Fig. 6B,  
334 compare lanes 2 and 3) whereas low concentrations of okadaic acid that inhibit PP2A  
335 but not PP1 did not affect Cdt1 dephosphorylation (Supplementary Fig. S5). In addition,  
336 we released nocodazole-arrested cells into G1 phase for 30 minutes (to initiate mitotic  
337 progression) and then treated the cells with calyculin A. As a control, we probed for  
338 MCM4, a known PP1 substrate that is normally dephosphorylated in G1 phase [63];  
339 calyculin A prevented MCM4 dephosphorylation (Fig. 6C). PP1 inhibition also largely  
340 prevented Cdt1 dephosphorylation during the mitosis-G1 phase transition without  
341 blocking overall mitotic progression as evidenced by Geminin degradation (Fig. 6C,  
342 lanes 2 and 3). These results suggest that a PP1 family phosphatase is required for  
343 Cdt1 dephosphorylation. By extension, we suggest that PP1 activity is required to re-  
344 activate Cdt1-MCM binding and origin licensing in G1 phase.

## 345 **Discussion**

### 346 **Cell cycle-dependent Cdt1 phosphorylation**

347 Metazoan Cdt1 is degraded during S phase, and this degradation is essential to  
348 prevent re-replication [34, 40, 64, 65]. Perhaps counter-intuitively, Cdt1 then actively  
349 accumulates beginning in late S phase, and by mitosis reaches a level similar to Cdt1 in  
350 G1 phase [16-21]. Despite the potential risk for re-licensing and re-replicating G2 DNA,  
351 these high Cdt1 levels serve two purposes: 1) Cdt1 is essential for stable kinetochore-  
352 microtubule attachments [21, 66], and 2) high levels of Cdt1 in mitosis can improve  
353 licensing efficiency in the next G1 phase [18]. In this study, we discovered that Cdt1  
354 phosphorylation during G2 phase inhibits Cdt1 licensing activity and contributes to  
355 preventing DNA re-replication during the time that Cdt1 levels are high in G2 and M  
356 phase.

357 We analyzed a cluster of Cyclin A/CDK1-dependent phosphorylation sites that are  
358 distinct from the previously characterized CDK sites at T29 and S31. This region of Cdt1  
359 is not strongly conserved among vertebrates (Fig. 1A and Supplementary Fig. S1), but  
360 most vertebrate Cdt1 linker sequences are nonetheless predicted to be similarly  
361 disordered, and most have at least one candidate CDK phosphorylation site  
362 (Supplementary Fig. S1). Interestingly, altering two additional sites in this region did not  
363 exacerbate the re-replication phenotype suggesting that four phosphorylations are

364 sufficient to achieve maximal human Cdt1 inhibition. In that regard, multisite Cdt1 linker  
365 phosphorylation may resemble other examples of cell cycle-dependent multisite  
366 phosphorylation in which the total negative charge is more important than the specific  
367 phosphorylated position [67].

368 We show that Cdt1 only binds strongly to endogenous Cyclin A and binds neither  
369 Cyclin E nor Cyclin B. The fact that Cdt1 is unlikely to be a direct target of Cyclin E  
370 activity is reassuring since Cyclin E is active in late G1 phase at the same time that  
371 MCM is loading, and it would be counterproductive to inhibit Cdt1 activity in late G1. On  
372 the other hand, undetectable Cyclin B binding is somewhat surprising since Cdt1  
373 remains phosphorylated throughout all of mitosis, and Cyclin A can be degraded at the  
374 beginning of mitosis [68, 69]. It may be that Cdt1 phosphorylation is maintained  
375 throughout mitosis by the high levels of active Cyclin B/CDK1 without the need for tight  
376 CDK-Cdt1 binding, or that a residual amount of tightly-bound Cyclin A maintains Cdt1  
377 phosphorylation, or that some unknown cellular kinase or phosphatase inhibitor keeps  
378 Cdt1 phosphorylated even after Cyclin A is degraded. If a minor kinase takes over from  
379 Cyclin A/CDK1, its activity is clearly also lost after treatment with a relatively selective  
380 CDK1 inhibitor. We also acknowledge that in actively proliferating cells Cyclin A/CDK2  
381 could contribute to direct Cdt1 inactivation in late S and G2 phase in a time window after  
382 Cdt1 accumulation but before substantial Cyclin A/CDK1 activation, but our  
383 synchronization experiment did not detect a role for CDK2 activity.

384 We demonstrate here that the CDK docking motif at Cdt1 positions 68-70 is required  
385 for phosphorylation not only at the previously investigated T29 position, but also at sites  
386 more than 300 residues towards the Cdt1 C-terminus. The structure of the yeast Cdt1-  
387 MCM complex indicates that when bound to MCM, Cdt1 is in a relatively extended  
388 conformation with the linker quite distant from the N-terminal domain [70-72]. We did not  
389 model the N-terminal domain of human Cdt1 because it bears almost no sequence  
390 similarity to the corresponding domain of budding yeast Cdt1. Our discovery that the  
391 mammalian Cy motif controls phosphorylation at sites very distant in the primary  
392 sequence prompt speculation that Cdt1 in isolation from MCM may adopt a conformation  
393 with the linker relatively close to the N-terminal regulatory domain for phosphorylation by  
394 the Cy motif-bound Cyclin A/CDK1.

395 **Phosphorylation inhibits Cdt1 binding to MCM.**

396 We found that hyperphosphorylated Cdt1 binds MCM poorly relative to  
397 hypophosphorylated Cdt1. This observation provides a simple mechanism for Cyclin  
398 A/CDK1-mediated phosphorylation to inhibit Cdt1 licensing activity. Both the Cdt1 N-  
399 terminal domain and the linker region are predicted to be intrinsically disordered, and the  
400 fact that these regions were excluded from mammalian Cdt1 fragments subjected to  
401 structure determination supports that prediction [26, 27]. The only structure of full-length  
402 Cdt1 available to date is a component of the budding yeast Cdt1-MCM or  
403 ORC/Cdc6/Cdt1/MCM complexes [71, 72], and budding yeast Cdt1 lacks candidate  
404 phosphorylation sites in the linker region. For this reason, we cannot determine precisely  
405 how phosphorylation in the linker inhibits MCM binding. We suggest however, that the  
406 introduction of multiple phosphorylations either induces a large conformational change in  
407 Cdt1 that prevents it from extending around the side of the MCM ring or alternatively,  
408 these phosphorylations may repel Cdt1 from the MCM surface (Fig. 5A).

409 We had previously established that the p38 and JNK stress-activated MAP kinases  
410 can phosphorylate at least some of these same inhibitory sites in Cdt1 [17], and a  
411 separate study reported a subset of these plus additional sites as potential JNK targets  
412 [41]. Both p38 and JNK are active during a G2 arrest [53-55, 73, 74], but our inhibitor  
413 results indicate that Cyclin A/CDK1 is dominant for Cdt1 phosphorylation during G2 and  
414 M phases in these cells. On the other hand, our findings here also shed light on the  
415 molecular mechanism of stress-induced origin licensing inhibition [17]. We postulate that  
416 stress MAPK-mediated Cdt1 hyperphosphorylation at the linker region blocks Cdt1-MCM  
417 binding in stressed G1 cells to prevent origin licensing. This phosphorylation blocks  
418 initial origin licensing by the same mechanism that prevents origin re-licensing in G2 and  
419 M phases. The p38 MAPK family is also active in quiescent cells [53, 54], and Cdt1 from  
420 lysates of serum-starved cells has slower gel mobility reminiscent of the same shift we  
421 and other observe in G2 and M phase cells [17]. We thus speculate that Cdt1 in  
422 quiescent cells is inhibited by a similar mechanism as the one we defined here.

423 The nine phosphorylation sites we tested in this study are certainly not the only  
424 phosphorylation sites in human Cdt1. Unbiased phosphoproteomics studies have  
425 detected phosphorylation at a total of 22 sites, 13 of which are also S/T-P sites [38]. In  
426 addition, a domain in the N-terminal region restrains Cdt1 licensing activity by influencing  
427 chromatin association includes at least two other mitotic CDK/MAPK sites [19]. It is not  
428 known if phosphorylation at those sites is strictly cell cycle-dependent or requires the Cy

429 motif. The fact that Cdt1-Cy has the highest activity of all the variants tested here may  
430 be a reflection of that additional negative regulation in the so-called “PEST domain.”  
431 Alternatively, the Cy motif mutation may disrupt more than only Cyclin binding such as  
432 has been recently reported for ORC [75]. Clearly the spectrum of Cdt1 biological  
433 activities can be tuned by combinations of phosphorylations and dephosphorylations,  
434 and continued in-depth analyses will yield additional insight into Cdt1 regulation and  
435 function.

436 Approximately one-third of all eukaryotic proteins may be dephosphorylated by PP1  
437 [60]. PP1 binds some of its substrates directly via a short motif, RVxF, KGILK or RKLHY  
438 [60, 76]. Human Cdt1 contains several such candidate PP1 binding motifs and thus may  
439 be a direct target of PP1. Alternatively, Cdt1 dephosphorylation may require an adapter  
440 to bind PP1 similar to the role of the Rif1 adapter for MCM dephosphorylation [63, 77,  
441 78]. In either case, the fact that hyperphosphorylated Cdt1 binds MCM poorly, plus the  
442 fact that the levels of Cdt1 do not change from M phase to G1 (i.e. Cdt1 is not degraded  
443 and resynthesized at the M-G1 transition), means that PP1-dependent Cdt1  
444 dephosphorylation *activates* origin licensing. In that regard, dephosphorylation is the first  
445 example of direct Cdt1 activation, and it complements the indirect activation by Geminin  
446 degradation at the M to G1 transition.

#### 447 **A sequential relay of re-replication inhibition mechanisms**

448 We propose that Cdt1 activity is restricted to only G1 through multiple regulatory  
449 mechanisms during a single cell cycle, but that the relative importance of individual  
450 mechanisms changes at different times after G1 (Fig. 6D). At the onset of S phase Cdt1  
451 is first subjected to rapid replication-coupled destruction via CRL4<sup>Cdt2</sup> which targets Cdt1  
452 bound to DNA-loaded PCNA [79]. This degradation alone is not sufficient to prevent re-  
453 replication however, and a contribution from Cyclin A/CDK2 to create a binding site for  
454 the SCF<sup>Skp2</sup> E3 ubiquitin ligase is also essential [34]. We suggest that SCF<sup>Skp2</sup>-targeting  
455 occurs primarily in mid and late S phase based on the dynamics of Cyclin A  
456 accumulation. A reinforcing mechanism for Cdt1 degradation is more important in mid  
457 and late S phase than in early S phase because the amount of DNA that has already  
458 been copied increases throughout S phase. The consequences of licensing DNA that  
459 hasn't yet been copied are presumably benign, but as S phase proceeds, the amount of  
460 DNA that has been copied already (i.e. the substrate for re-replication) also increases.  
461 The Cdt1 inhibitor, Geminin, begins to accumulate near the G1-S transition, and its

462 levels increase along with the amount of replicated DNA until Geminin is targeted for  
463 degradation by the APC/C during mitosis [24, 59]. Geminin binding to Cdt1 interferes  
464 with Cdt1-MCM binding, and since Cdt1-MCM binding is essential for MCM loading,  
465 Geminin prevents re-licensing [35, 36]. This inhibition is particularly important once Cdt1  
466 re-accumulates after S phase is complete [37]. Just as CRL4<sup>Cdt2</sup>-mediated degradation  
467 in S phase is not sufficient to fully prevent re-replication, we demonstrated that the  
468 presence of Geminin alone is not sufficient to inhibit Cdt1 during G2. Cdt1  
469 phosphorylation in a linker domain between two MCM binding sites also prevents Cdt1-  
470 MCM binding. These (and potentially more) mechanisms to restrain Cdt1 activity are  
471 also reinforced by regulation to inhibit ORC, Cdc6, PR-Set7, and other licensing  
472 activators [4, 33, 80, 81]. The relative importance of any one mechanism will be  
473 influenced by cell type and species. Given that there are many thousands of origins in  
474 mammalian genomes, and the consequences of even a small amount of re-replication  
475 are potentially dire, we suggest that precise once-and-only-once replication requires that  
476 Cdt1 be inhibited by at least two mechanisms at all times from G1 through mitosis.

477

## 478 **Materials and Methods**

### 479 **Cell Culture and Manipulations**

480 U2OS Flp-in Trex cells [82] bearing a single FRT site (gift of J. Aster) and HEK 293T  
481 cells were arrested by thymidine-nocodazole synchronization by treatment with 2 mM  
482 thymidine for 18 h followed by release into 100 nM nocodazole for 10 h. Cells were  
483 treated with inhibitors for 1 hour and harvested by mitotic shake-off, with the exception  
484 that RO-3306 treatment was for just 15 minutes. Cells were treated with 10  $\mu$ M, RO-  
485 3306 (Sigma), 6  $\mu$ M CVT313 (Sigma), 10  $\mu$ M JNK inhibitor VIII (Sigma), 30  $\mu$ M  
486 SB203580 (Sigma), 20  $\mu$ M MG132 (Sigma), Okadaic acid (Abcam #ab120375), or 20  
487 nM, calyculin A (LC Laboratories) as indicated. HEK 293T cells were transfected with  
488 Cdt1 expression plasmids using PEI Max (Sigma) and cultured for 16 hours. All cell lines  
489 were validated by STR profiling and monitored by mycoplasma testing. For flow  
490 cytometry, cells were cultured in complete medium with 1  $\mu$ g/mL doxycycline for 48  
491 hours labeled with 10  $\mu$ M EdU (Sigma) for 1 hour prior to harvesting.

### 492 **Antibodies**



493 Antibodies were purchased from the following sources: Cdt1 (Cat# 8064), Chk1 (Cat#  
494 2345), phospho-Chk1 S345 (Cat# 2341), Cyclin E1 (Cat#4129), MAPKAPK-2 (Cat#),  
495 Phospho-MAPKAPK-2 T334 (Cat#3007), phospho-Histone H2A.X Ser139 (Cat#9718)  
496 from Cell Signaling Technologies; hemagglutinin (HA) (Cat#11867423001) from Roche;  
497 Geminin (Cat#sc-13015), Cdc6 (Cat#sc-9964), MCM6 (Cat#sc-9843), Cyclin A (Cat#sc-  
498 596), Cyclin B1 (Cat#sc-245) and CDK2 (Cat#sc-163) from Santa Cruz Biotechnology;  
499 MCM4 (Cat#3728) from Abcam. MCM2 antibody (Cat#A300-191A) used for co-  
500 immunoprecipitation experiment was purchased from Bethyl Laboratories. MCM2  
501 antibody (BD Biosciences, Cat#610700) was used for analytical flow cytometry. Serum  
502 to detect CDK1 was a gift from Y. Xiong (University of North Carolina), and MPM2  
503 antibody was a gift from R. Duronio [83] (University of North Carolina). The  
504 phosphospecific Cdt1 antibody was described in Chandrasekaran et al [17].; the third  
505 and fourth test bleeds are active for Cdt1 immunoprecipitation. Alexa 647-azide and  
506 Alexa-488-azide used in flow cytometry analyses was purchased from Life  
507 Technologies, and secondary antibodies for immunoblotting and immunofluorescence  
508 were purchased from Jackson ImmunoResearch.

### 509 **Protein-protein interaction assays**

510 For polyhistidine pulldown assays, cells were lysed in lysis buffer (50 mM HEPES pH  
511 8.0, 33 mM KAc, 117 mM NaCl, 20 mM imidazole, 0.5% triton X-100, 10% glycerol) plus  
512 protease inhibitors (0.1 mM AEBSF, 10 µg/mL pepstatin A, 10 µg/mL leupeptin, 10  
513 µg/mL aprotinin), phosphatase inhibitors (5 µg/mL phosphatidyl, 1 mM β-glycerol phosphate,  
514 1 mM Na-orthovanadate), 1 mM ATP, 1 mM MgCl<sub>2</sub>, 5 mM CaCl<sub>2</sub> and 15 units of S7  
515 micrococcal nuclease (Roche). Lysates were sonicated for 10 seconds at low power  
516 followed by incubation on ice for 30 minutes and clarification by centrifugation at 13,000  
517 x g for 15 minutes at 4°C. The supernatants were incubated with nickel NTA agarose  
518 beads (Qiagen) for 2 hours at 4°C with rotation. Beads were rinsed 4 times rapidly with  
519 ice-cold lysis buffer followed by boiling in SDS sample buffer for 5 minutes prior to  
520 immunoblot.

521 For co-immunoprecipitation assays, cells were lysed in Co-IP buffer (50 mM HEPES pH  
522 7.2, 33 mM KAc, 1 mM MgCl<sub>2</sub>, 0.5% triton X-100, and 10% glycerol) containing protease  
523 inhibitors (0.1 mM AEBSF, 10 µg/mL pepstatin A, 10 µg/mL leupeptin, 10 µg/mL  
524 aprotinin), phosphatase inhibitors (5 µg/mL phosphatidyl, 1 mM β-glycerol phosphate, 1 mM  
525 Na-orthovanadate), 1 mM ATP, and supplemented with 5 mM CaCl<sub>2</sub> and 15 units of S7

526 micrococcal nuclease (Roche). Lysates were sonicated for 10 seconds at low power  
527 followed by incubation on ice for 30 minutes and clarification by centrifugation at 13,000  
528 x g for 15 minutes at 4°C. The supernatants were incubated and rotated with Protein A  
529 beads (Roche) with an anti-Mcm2 antibody (Bethyl, 1:1000) at 4°C with rotation for 4  
530 hours. Beads were rinsed three times with ice-cold co-IP buffer then eluted by boiling in  
531 sample buffer for subsequent immunoblot analysis.

### 532 **Immunofluorescence microscopy**

533 U2OS cells cultured on cover glass were fixed with 4% PFA for 15 minutes and  
534 permeabilized with 0.5% Triton in PBS for 5 minutes. Cells were blocked in 1% BSA for  
535 30 minutes followed by incubation with primary antibody overnight at 4°C and secondary  
536 antibody for 1 hour at room temperature. Cells were stained with 1 µg/ml DAPI for 5  
537 minutes before mounting with the ProLong® Gold Antifade mounting medium (life  
538 technologies). Fluorescent images were captured on a Nikon 2000E microscope. The  
539 areas of nuclei were measured by using the Adobe Photoshop software.

### 540 **Analytical flow cytometry.**

541 For cell cycle analysis, cells were cultured in complete medium with 1 µg/ml doxycycline  
542 for 48 hours. Cells were pulse labeled with 10 µM EdU (Sigma) for 60 minutes prior to  
543 harvesting by trypsinization. Cells were washed with PBS and then fixed in 4%  
544 paraformaldehyde (Sigma) followed by processing for EdU conjugation to Alexa Fluor  
545 647-azide (Life Technologies). Samples were centrifuged and incubated in PBS with 1  
546 mM CuSO<sub>4</sub>, 1 mM fluorophore-azide, and 100 mM ascorbic acid (fresh) for 30 min at  
547 room temperature in the dark then washed with PBS. Total DNA was detected by  
548 incubation in 1 µg/mL DAPI (Life Technologies) and 100 µg/mL RNase A (Sigma).

549 For MCM loading analysis, U2OS cells were cultured in complete medium with 0.05  
550 µg/mL doxycycline for 24 hours to induce expression of ectopic constructs..

551 Approximately 20% of this suspension was reserved for subsequent immunoblotting  
552 analysis while the remaining 80% was analyzed for bound MCM as described in Matson  
553 et al. [42]. Briefly, cells were extracted in cold CSK buffer (10 mM Pipes pH 7.0, 300 mM  
554 sucrose, 100 mM NaCl, 3 mM MgCl<sub>2</sub>) supplemented with 0.5% triton X-100, protease  
555 inhibitors (0.1 mM AEBSF, 1 µg/mL pepstatin A, 1 µg/mL leupeptin, 1 µg/mL aprotinin),  
556 and phosphatase inhibitors (10 µg/mL phosphatidyl, 1 mM β-glycerol phosphate, 1 mM Na-  
557 orthovanadate). Cells were washed with PBS plus 1% BSA and then fixed in 4%

558 paraformaldehyde (Sigma) followed by processing for EdU conjugation. Bound MCM  
559 was detected by incubation with anti-MCM2 primary antibody at 1:200 dilution and anti-  
560 mouse-488 at 1:1,000 dilution at 37 °C for 1 hour. Data were collected on an Attune NxT  
561 flow cytometer (Thermo Fisher Scientific) and analyzed using FCS Express 7 (De Novo  
562 Software) software. Control samples were prepared omitting primary antibody or EdU  
563 detection to define thresholds of detection as in Matson et al 2017 [42].

#### 564 **In vitro kinase assay**

565 200 ng of recombinant human Cdt1 (OriGene, Cat #: TP301657) and 20 ng of purified  
566 Cyclin A/Cdk1 (Sigma cat. #CO244, lot SLBW3287) were incubated in kinase buffer (50  
567 mM Tris pH 7.5, 10 mM MgCl<sub>2</sub>) supplemented with protease inhibitors (0.1 mM AEBSF,  
568 10 µg/mL pepstatin A, 10 µg/mL leupeptin, 10 µg/mL aprotinin), phosphatase inhibitors  
569 (5 µg/mL phosphatidylserine, 1 mM β-glycerol phosphate, 1 mM Na-orthovanadate), 10 µM ATP, 2  
570 µCi of [γ-<sup>32</sup>P]-ATP, and in the presence or absence of roscovitine (20 µM) for 1 hr at 30  
571 °C. Reactions were stopped by adding loading buffer for subsequent SDS-PAGE and  
572 autoradiography.

#### 573 **Statistical analysis**

574 The differences were considered significant with a p-value less than 0.05. Values for  
575 multiple independent experiments were analyzed by one-way ANOVA for multiple  
576 comparisons without corrections (Fishers LSD test) but with pre-planned comparisons as  
577 described in the text. (Parallel analysis with Tukey's multiple comparisons test did not  
578 alter interpretations.) Significance testing was performed using Prism 8 (GraphPad).

#### 579 **Data availability**

580 All expression constructs and data in the manuscript are available from the authors  
581 upon reasonable request.

#### 582 **Acknowledgements**

583 We thank Y. Xiong, R. Duronio, L. Graves, and J. Aster for the generous gifts of  
584 antibodies and reagents, and all members of the Cook lab for discussion and comments  
585 on the manuscript; S. Hailemariam and D. Tesfu contributed to early development steps  
586 in this project. We thank Jeffrey Jones for research support assistance. The UNC  
587 Hooker Imaging Core and the UNC Flow Cytometry Core Facility are supported in part  
588 by a National Institutes of Health Cancer Core Support Grant to the UNC Lineberger

589 Comprehensive Cancer Center (CA016086). This work was also supported by National  
590 Institutes of Health grants F31GM121073 to P.N.P. and R01GM102413 and  
591 R01GM083024 to J.G.C.

592 **Author Contributions**

593 Y.Z., S.O. and J.G.C. conceived the study. Y.Z. and P.N. P. performed and designed  
594 most of the experiments; H.M.S. performed the Cdt1 dephosphorylation experiments,  
595 S.O. generated some of the Cdt1 expression constructs and collected data in HeLa  
596 cells. J.G.C., Y.Z., and P.N.P. interpreted the results, analyzed the data, produced the  
597 figures, and wrote the manuscript.

598

599

600

601 **Figure Legends**

602 **Figure 1. Cdt1 phosphorylation restrains re-replication.**

603 **A)** Schematic of the human Cdt1 protein illustrating features and variants relevant to this  
604 study. Cdt1 contains two structurally characterized domains, the Geminin and MCM  
605 binding domain (M) and a C-terminal MCM binding domain (C). The Ser/Thr-Pro sites  
606 that were altered for this study are marked with green ovals, and the cyclin binding motif  
607 is marked with a green triangle. Positions are T29, S31, S372, S391, S394, T402, T406,  
608 S411, and S491; the cyclin binding motif (Cy) is 68-70. Human Cdt1 was aligned with 26  
609 vertebrate Cdt1 sequences using ClustalW, and a relative conservation score was  
610 derived (see also Methods and Supplementary Fig. S1). The blue heatmap indicates  
611 relative conservation at each amino acid position of human Cdt1. An intrinsic disorder  
612 score was also derived for human Cdt1 and shown as the corresponding orange  
613 heatmap. Darker shades indicate greater conservation or disorder respectively.

614 **B)** Asynchronously growing U2OS cells with the indicated chromosomally-integrated  
615 inducible Cdt1 constructs were treated with 1  $\mu\text{g}/\text{mL}$  doxycycline for 48 hours and  
616 labeled with EdU for 1 hour before harvesting. Cells were analyzed by flow cytometry for  
617 DNA content with DAPI and for DNA synthesis by EdU detection; the workflow is  
618 illustrated at the top. The bar graph plots the percentages of re-replicating cells across  
619 all experiments. Bars report mean and standard deviations. Asterisks indicate statistical  
620 significance determined by one-way ANOVA (\* $p=0.0175$ , \*\* $p=0.0023$ , \*\*\* $p=0.007$ , \*\*\*\*  
621  $p<0.0001$ ); 5A vs 7A, 5A vs 4A and WT vs 491A were not significant as defined by  
622  $p>0.05$ .

623 **C)** One representative of the multiple independent biological replicates summarized in B  
624 is shown.

625 **D)** Whole cell lysates as in B were subjected to immunoblotting for ectopic (HA) or  
626 endogenous and ectopic Cdt1; Ponceau S staining of total protein serves as a loading  
627 control.

628 **E)** Asynchronously growing U2OS cells were treated with 1  $\mu\text{g}/\text{mL}$  doxycycline for 48  
629 hours, and whole cell lysates were probed for phospho-Chk1 (S345), total Chk1, HA-  
630 Cdt1, and total protein; one example of at least two independent experiments is shown.

631

632

633

634 **Figure 2. Cdt1 phosphorylation prevents MCM re-loading in G2 cells.**

635 **A)** Workflow: Asynchronously proliferating U2OS cells with inducible Cdt1 were treated  
636 with 0.05 µg/ml doxycycline then subjected to immunoblotting in B or analytical flow  
637 cytometry in C and D.

638 **B)** Immunoblot analysis of initial Cdt1 expression 6 hrs after dox induction. Lysates were  
639 probed with anti-Cdt1 to detect both endogenous and ectopic Cdt1.

640 **C)** Flow cytometry analysis of MCM loading 24 hrs after ectopic Cdt1 induction. Cells  
641 were detergent-extracted prior to fixation to remove unbound MCM, then stained for  
642 DNA content with DAPI (x-axes) and with anti-MCM2 as a marker of loaded MCM  
643 complexes (y-axes). One representative of multiple independent biological replicates is  
644 shown, and the illustration depicts typical positions of proliferating cells in G1, S, and G2  
645 phase. The dashed boxes show the gates to quantify MCM re-loading in late S/G2 cells.

646 **D)** Quantification of four independent replicates as in C. The bars report means and  
647 standard deviations. Asterisks indicate statistical significance determined by one-way  
648 ANOVA (\*\*p= 0.0002, \*\*\*\* p<0.0001); Control vs WT was not significant as defined by  
649 p>0.05.

650

651

652 **Figure 3. Cdt1 hyperphosphorylation is dependent on linker sites and CDK1**  
653 **activity.**

654 **A)** Workflow for cell line synchronization and inhibitor treatment.

655 **B)** Whole cell lysates were separated by Phos-tag SDS-PAGE (top) or standard SDS-  
656 PAGE (middle) followed by immunoblotting for ectopic Cdt1 (HA); total protein stain  
657 serves as a loading control.

658 **C)** Cells were synchronized with nocodazole as in A, then mock treated or treated with  
659 10 µM RO-3306 (lane 2), 6 µM CVT313 (lane 4), 30 µM SB203580 (lane 5), 10 µM JNK  
660 inhibitor VIII (lane 6), or combinations of inhibitors as indicated for 1 hour except that  
661 RO3306 treatment was for only the final 15 minutes to preserve mitotic cell morphology.  
662 All cells were simultaneously treated with 20 µM MG132 to prevent premature mitotic  
663 exit. Endogenous Cdt1 phosphorylation was assessed by standard or Phos-tag SDS-  
664 PAGE followed by immunoblotting; total protein stain serves as a loading control. The  
665 example shown is representative of more than three independent experiments.

666

667 **Figure 4. Cyclin A/CDK1 phosphorylates Cdt1 linker sites.**

668 **A)** HEK 293T cells were transfected with control plasmid or plasmid producing His-  
669 tagged Cdt1-WT or a Cdt1-variant that cannot bind CDKs (Cdt1-Cy) then synchronized  
670 with nocodazole and harvested by mitotic shake off. Cdt1 was retrieved on nickel-  
671 agarose, and the indicated endogenous proteins were detected in whole cell lysates  
672 (lanes 1-3) and bound fractions (lanes 4-6) by immunoblotting. The result is  
673 representative of at least two independent experiments.

674 **B)** Recombinant partially-purified Cdt1 was incubated with purified Cyclin A/CDK1 in the  
675 presence of  $^{32}\text{P}$ - $\gamma$ -ATP in kinase buffer for one hour at 30°C. Control reactions contained  
676 Cdt1 only, kinase only, or were complete reactions in the presence of 20  $\mu\text{M}$  roscovitine  
677 (CDK inhibitor) as indicated. Reactions were separated by SDS-PAGE followed by  
678 autoradiography.

679 **C)** Recombinant Cdt1 was incubated with purified Cyclin A/CDK1 in the presence of  
680 unlabeled ATP as in B; roscovitine was included as indicated. Reactions were subjected  
681 to immunoprecipitation with either pre-immune serum or immune sera to retrieve Cdt1  
682 phosphorylated at S402, S406, and T411; Ab<sub>3</sub> and Ab<sub>4</sub> are consecutive test bleeds from  
683 the immunized rabbit. Both input and bound proteins were probed for total Cdt1 by  
684 immunoblotting.

685

686 **Figure 5. Hyperphosphorylation impairs Cdt1-MCM binding.**

687 **A)** Two views of a homology model of the human MCM<sub>2-7</sub>-Cdt1 complex as described in  
688 Pozo *et al.* 2018; numbers refer to individual MCM subunits. The disordered linker  
689 containing phosphorylation sites is hand-drawn connecting the two structured Cdt1  
690 domains (MD and CD) in the model.

691 **B)** Asynchronously growing or nocodazole-arrested HEK293T cells ectopically  
692 expressing HA-tagged Cdt1-WT or the Cdt1-Cy variant were lysed and subjected to  
693 immunoprecipitation with anti-MCM2 antibody. Whole cell lysates (lanes 1-4) and bound  
694 proteins (lanes 5-10) were probed for HA, MCM6 and Geminin, respectively; total protein  
695 stain serves as a loading control. The results are representative of two independent  
696 experiments.

697 **C)** A lysate of nocodazole-arrested (Cdt1 hyperphosphorylated, Geminin-expressing)  
698 U2OS cells producing HA-tagged Cdt1-WT was mixed with lysate from the same cells  
699 growing asynchronously as indicated. Asynchronous cells contain mostly  
700 hypophosphorylated Cdt1 and very little Geminin. These lysates were then subjected to  
701 immunoprecipitation with anti-MCM2 antibody and probed for bound Cdt1. Input lysates  
702 (lanes 1-3) and bound proteins (lanes 4-6) were probed for HA-Cdt1, MCM6 (as a  
703 marker of the MCM complex), and Geminin. The example shown is representative of  
704 three independent experiments.

705

706 **Figure 6. Cdt1 dephosphorylation at the M-G1 transition requires PP1.**

707 **A)** Nocodazole-arrested U2OS cells were released into fresh medium and collected at  
708 the indicated time points. Endogenous Cdt1 phosphorylation (top) and Geminin (middle)  
709 degradation were analyzed by immunoblotting; Ponceau S staining for total protein and  
710 a non-specific band (\*) serve as loading controls. The results are representative of two  
711 independent experiments.

712 **B)** Nocodazole-arrested U2OS cells were mock treated (lane 1) or treated with 10  $\mu$ M  
713 RO-3306 (CDK1i, lane 2), or treated with both 10  $\mu$ M RO-3306 and with 20 nM calyculin  
714 A as indicated (CalA, lane 3). Endogenous Cdt1 phosphorylation was analyzed by  
715 standard or Phos-tag SDS-PAGE followed by immunoblotting; total protein stain serves  
716 as a loading control. The results are representative of three independent experiments.

717 **C)** Nocodazole-arrested U2OS cells (lane 2) were released into fresh medium for 3  
718 hours and mock treated (lane 1) or treated with 20 nM calyculin A 30 minutes after  
719 release (lane 3). Endogenous Cdt1 or MCM4 phosphorylation and total Geminin were  
720 detected by immunoblotting; total protein stain serves as a loading control. The results  
721 are representative of three independent experiments.

722 **D)** Model. In S phase Cdt1 is targeted for degradation, first by the CRL4<sup>Cdt2</sup> E3 ubiquitin  
723 ligase at the onset of S phase and then additionally by SCF<sup>Skp2</sup> after phosphorylation by  
724 Cyclin A/CDK2. Geminin accumulates starting in early S phase. The amount of  
725 duplicated DNA at risk of re-replication is lowest in early S and highest in G2. In late S  
726 and G2 phase Cdt1 re-accumulates and Geminin is at high levels. Cyclin A/CDK1  
727 phosphorylates Cdt1, and both Geminin and Cdt1 hyperphosphorylation independently



728 block Cdt1-MCM binding. At the M→G1 transition Protein Phosphatase 1 is required for  
729 Cdt1 dephosphorylation to reactivate MCM loading by Cdt1, ORC, and Cdc6.

730

731 **Figure S1. Cdt1 linker phosphorylation sites in 27 vertebrate sequences.**

732 A selection of 27 vertebrate sequences for comparison was taken from Miller *et al.*  
733 (2007), and Cdt1 protein sequences were retrieved from <https://www.uniprot.org/>. For  
734 the Cdt1 alignment, *Xenopus tropicalis* in Miller *et al.* was replaced with *Xenopus laevis*  
735 Cdt1, *Tupaia belangeri* was replaced with *Tupaia chinensis*, and no Cdt1 sequence for  
736 *Echinops telfairi* (tenrec) was available. These 27 full-length sequences were aligned  
737 with ClustalW at <https://www.genome.jp/tools-bin/clustalw> using the default settings, and  
738 the resulting alignment was visualized with BoxShade, 50% identity or similarity were  
739 shaded medium and light grey ([https://embnet.vital-it.ch/software/BOX\\_form.html](https://embnet.vital-it.ch/software/BOX_form.html)). The  
740 portion corresponding to the Cdt1 linker domain is shown using common names. All  
741 potential CDK/MAPK phosphorylation sites are shaded green, and an 85 residue  
742 insertion in chicken Cdt1 lacking any potential CDK/MAPK phosphorylation sites was  
743 deleted for clarity. The 27 sequences are from the following species: *Homo sapiens*, *Pan*  
744 *troglodytes*, *Macaca mulatta*, *Otolemur garnettii*, *Tupaia chinensis*, *Rattus norvegicus*,  
745 *Mus musculus*, *Cavia porcellus*, *Oryctolagus cuniculus*, *Sorex araneus*, *Erinaceus*  
746 *europaeus*, *Canis familiaris*, *Felis catus*, *Equus caballus*, *Bos Taurus*, *Dasypus*  
747 *novemcinctus*, *Loxodonta Africana*, *Monodelphis domestica*, *Ornithorhynchus anatinus*,  
748 *Gallus gallus*, *Anolis carolinensis*, *Xenopus laevis*, *Tetraodon nigroviridis*, *Takifugu*  
749 *rubripes*, *Gasterosteus aculeatus*, *Oryzias latipes*, and *Danio rerio*.

750

751 **Figure S2. Unphosphorylatable Cdt1 induces giant nuclei formation and DNA**  
752 **damage.**

753 **A)** U2OS cells were treated with 1 µg/mL doxycycline for 48 hours before fixation and  
754 staining with DAPI. Nuclear sizes were analyzed by measuring DAPI area using  
755 Photoshop software. The average nuclear area of cells overproducing Cdt1-WT was 1.2  
756 fold larger than control cells, whereas cells expressing Cdt1-5A had even larger average  
757 nuclear area (~1.7 fold higher than control cells). Representative results of two  
758 independent experiments are shown; total numbers of cells analyzed is listed under the

759 histograms. Asterisks indicate statistical significance (\*\* $p < 0.001$ , \*\* $p < 0.01$ ) determined  
760 by Mann–Whitney U -test. Mean +/- standard deviation is indicated.

761 **B)** U2OS cells were treated as indicated in **(A)** and stained with an anti- $\gamma$ -H2AX antibody  
762 (green). Nuclei were stained with DAPI (blue). Representative results of two independent  
763 experiments are shown. Quantification of the percentage of  $\gamma$ -H2AX positive cells is  
764 shown with the total number of cells analyzed listed under the histogram.

765

### 766 **Figure S3. Cdt1 is phosphorylated to inhibit DNA re-replication.**

767 Quantification of the experiments in (Fig. 1B and 1C) showing all cell cycle phase  
768 distributions (G1, S, G2/M, and re-replication).  $n > 4$ .

769

### 770 **Figure S4. Cdt1 mobility by Phos-Tag gel analysis and tests of inhibitor activities.**

771 **A)** Asynchronously proliferating U2OS cells ectopically expressing HA-tagged Cdt1-WT  
772 were treated with 20 J/m<sup>2</sup> UV 60 minute prior to harvest to induce degradation of Cdt1  
773 (lane 1). Cells were also synchronized in G1 phase by nocodazole arrest and release for  
774 3 hrs (lane 2) or held in nocodazole plus MG132 to induce Cdt1 hyperphosphorylation  
775 (lane 3). Lysates of arrested cells were either mock-treated (lane 3) or incubated with  
776 lambda and CIP phosphatase (lane 4) for 30 minutes. The samples were then subjected  
777 to Phos-tag SDS-PAGE followed by immunoblotting with HA antibody.

778 **B)** U2OS cells were treated as indicated in Fig. 3C. Mitotic phosphoproteins were  
779 analyzed by immunoblotting with an anti-Mpm-2 antibody, a mitotic marker that  
780 recognizes a large subset of mitotic phosphoproteins and is sensitive to CDK1 activity in  
781 M phase [56].

782 **C)** U2OS cells were mock treated (lane 1) or treated with 6  $\mu$ M CVT313 for 6 hours (lane  
783 2), then probed for endogenous Cdc6. Cdc6 is stabilized by CDK2/Cyclin E activity  
784 during late G1 phase, and its degradation reflects loss of CDK2-mediated stabilization  
785 [57].

786 **D)** U2OS cells were mock treated (lane 2), treated with 20 J/m<sup>2</sup> UV (lane 1), or arrested  
787 in G2/M phase (lane 3) followed by 30  $\mu$ M SB203580 treatment (lane 4) for one hour.  
788 The mitogen-activated protein kinase-activated protein kinase 2 (MK2) is a direct  
789 substrate of p38 [84]. The phosphorylation and total protein levels of MK2 were analyzed

790 by immunoblotting. PonceauS total protein stain serves as a loading control, and  
791 representative results of two independent experiments are shown.

792

793 **Figure S5. Cdt1 dephosphorylation is inhibited by calyculin A (CaIA) and high-**  
794 **dose okadaic acid (OA).** U2OS cells arrested with nocodazole were treated with  
795 MG132 and CDK1 inhibitor (lanes 4, 6, and 8) to induce dephosphorylation. As  
796 indicated, cells were pre-treated for one hour with okadaic acid (OA, lanes 5-8) or with  
797 calyculin A (CaIA lanes 3-4) at the indicated concentrations. Okadaic acid inhibits PP2A  
798 at low concentrations and can only inhibit PP1 at high concentrations [61]. Cells were  
799 harvested by mitotic shake off, and whole cell lysates were subjected to standard SDS-  
800 PAGE followed by immunoblotting with HA antibody. A representative of two  
801 independent experiments is shown.

802

803

804

805

806

807

808

809

810

811

## References

- 812 1. Parker MW, Botchan MR, Berger JM. Mechanisms and regulation of DNA  
813 replication initiation in eukaryotes. *Crit Rev Biochem Mol Biol.* 2017;52(2):107-44.  
814 Epub 2017/01/18. doi: 10.1080/10409238.2016.1274717. PubMed PMID:  
815 28094588; PubMed Central PMCID: PMC5545932.
- 816 2. Masai H, Matsumoto S, You Z, Yoshizawa-Sugata N, Oda M. Eukaryotic  
817 chromosome DNA replication: where, when, and how? *Annu Rev Biochem.*  
818 2010;79:89-130. Epub 2010/04/09. doi: 10.1146/annurev.biochem.052308.103205.  
819 PubMed PMID: 20373915.
- 820 3. Siddiqui K, On KF, Diffley JF. Regulating DNA replication in eukarya. *Cold Spring*  
821 *Harb Perspect Biol.* 2013;5(9). doi: 10.1101/cshperspect.a012930. PubMed PMID:  
822 23838438; PubMed Central PMCID: PMC3753713.
- 823 4. Arias EE, Walter JC. Strength in numbers: preventing rereplication via multiple  
824 mechanisms in eukaryotic cells. *Genes Dev.* 2007;21(5):497-518. Epub  
825 2007/03/09. PubMed PMID: 17344412.
- 826 5. Mechali M. Eukaryotic DNA replication origins: many choices for appropriate  
827 answers. *Nat Rev Mol Cell Biol.* 2010;11(10):728-38. Epub 2010/09/24. doi:  
828 10.1038/nrm2976. PubMed PMID: 20861881.
- 829 6. Li C, Jin J. DNA replication licensing control and rereplication prevention. *Protein &*  
830 *cell.* 2010;1(3):227-36. doi: 10.1007/s13238-010-0032-z. PubMed PMID:  
831 21203969.
- 832 7. Truong LN, Wu X. Prevention of DNA re-replication in eukaryotic cells. *Journal of*  
833 *molecular cell biology.* 2011;3(1):13-22. doi: 10.1093/jmcb/mjq052. PubMed PMID:  
834 21278447; PubMed Central PMCID: PMC3030972.
- 835 8. Hook SS, Lin JJ, Dutta A. Mechanisms to control rereplication and implications for  
836 cancer. *Curr Opin Cell Biol.* 2007;19(6):663-71. Epub 2007/12/07. doi:  
837 10.1016/j.ceb.2007.10.007. PubMed PMID: 18053699; PubMed Central PMCID:  
838 PMC2174913.
- 839 9. Blow JJ, Gillespie PJ. Replication licensing and cancer--a fatal entanglement?  
840 *Nature reviews.* 2008;8(10):799-806. doi: 10.1038/nrc2500. PubMed PMID:  
841 18756287; PubMed Central PMCID: PMC2577763.
- 842 10. Munoz S, Bua S, Rodriguez-Acebes S, Megias D, Ortega S, de Martino A, et al. In  
843 Vivo DNA Re-replication Elicits Lethal Tissue Dysplasias. *Cell Rep.*  
844 2017;19(5):928-38. doi: 10.1016/j.celrep.2017.04.032. PubMed PMID: 28467906.
- 845 11. Pozo PN, Cook JG. Regulation and Function of Cdt1; A Key Factor in Cell  
846 Proliferation and Genome Stability. *Genes (Basel).* 2016;8(1). doi:  
847 10.3390/genes8010002. PubMed PMID: 28025526.
- 848 12. Borlado LR, Mendez J. CDC6: from DNA replication to cell cycle checkpoints and  
849 oncogenesis. *Carcinogenesis.* 2008;29(2):237-43. Epub 2007/12/01. doi:  
850 10.1093/carcin/bgm268. PubMed PMID: 18048387.
- 851 13. Reuswig KU, Pfander B. Control of Eukaryotic DNA Replication Initiation-  
852 Mechanisms to Ensure Smooth Transitions. *Genes (Basel).* 2019;10(2). Epub  
853 2019/02/01. doi: 10.3390/genes10020099. PubMed PMID: 30700044; PubMed  
854 Central PMCID: PMC6409694.
- 855 14. Hills SA, Diffley JF. DNA replication and oncogene-induced replicative stress. *Curr*  
856 *Biol.* 2014;24(10):R435-44. Epub 2014/05/23. doi: 10.1016/j.cub.2014.04.012.  
857 PubMed PMID: 24845676.
- 858 15. Brustel J, Tardat M, Kirsh O, Grimaud C, Julien E. Coupling mitosis to DNA  
859 replication: the emerging role of the histone H4-lysine 20 methyltransferase PR-

- 860 Set7. Trends in cell biology. 2011;21(8):452-60. Epub 2011/06/03. doi:  
861 10.1016/j.tcb.2011.04.006. PubMed PMID: 21632252.
- 862 16. Nishitani H, Taraviras S, Lygerou Z, Nishimoto T. The human licensing factor for  
863 DNA replication Cdt1 accumulates in G1 and is destabilized after initiation of S-  
864 phase. J Biol Chem. 2001;276(48):44905-11. Epub 2001/09/14. doi:  
865 10.1074/jbc.M105406200. PubMed PMID: 11555648.
- 866 17. Chandrasekaran S, Tan TX, Hall JR, Cook JG. Stress-stimulated mitogen-  
867 activated protein kinases control the stability and activity of the Cdt1 DNA  
868 replication licensing factor. Mol Cell Biol. 2011;31(22):4405-16. Epub 2011/09/21.  
869 doi: 10.1128/MCB.06163-11. PubMed PMID: 21930785; PubMed Central PMCID:  
870 PMCPMC3209262.
- 871 18. Ballabeni A, Melixetian M, Zamponi R, Masiero L, Marinoni F, Helin K. Human  
872 geminin promotes pre-RC formation and DNA replication by stabilizing CDT1 in  
873 mitosis. EMBO J. 2004;23(15):3122-32. Epub 2004/07/17. doi:  
874 10.1038/sj.emboj.7600314. PubMed PMID: 15257290; PubMed Central PMCID:  
875 PMCPMC514931.
- 876 19. Coulombe P, Gregoire D, Tsanov N, Mechali M. A spontaneous Cdt1 mutation in  
877 129 mouse strains reveals a regulatory domain restraining replication licensing.  
878 Nat Commun. 2013;4:2065. Epub 2013/07/03. doi: 10.1038/ncomms3065. PubMed  
879 PMID: 23817338.
- 880 20. Rizzardi LF, Coleman KE, Varma D, Matson JP, Oh S, Cook JG. CDK1-dependent  
881 inhibition of the E3 ubiquitin ligase CRL4CDT2 ensures robust transition from S  
882 Phase to Mitosis. J Biol Chem. 2015;290(1):556-67. doi:  
883 10.1074/jbc.M114.614701. PubMed PMID: 25411249; PubMed Central PMCID:  
884 PMCPMC4281756.
- 885 21. Varma D, Chandrasekaran S, Sundin LJ, Reidy KT, Wan X, Chasse DA, et al.  
886 Recruitment of the human Cdt1 replication licensing protein by the loop domain of  
887 Hec1 is required for stable kinetochore-microtubule attachment. Nat Cell Biol.  
888 2012;14(6):593-603. Epub 2012/05/15. doi: 10.1038/ncb2489. PubMed PMID:  
889 22581055; PubMed Central PMCID: PMCPMC3366049.
- 890 22. Yanagi KI, Mizuno T, You Z, Hanaoka F. Mouse geminin inhibits not only Cdt1-  
891 MCM6 interactions but also a novel intrinsic Cdt1 DNA binding activity. J Biol  
892 Chem. 2002;277(43):40871-80.
- 893 23. Cook JG, Chasse DA, Nevins JR. The regulated association of Cdt1 with  
894 minichromosome maintenance proteins and Cdc6 in mammalian cells. J Biol  
895 Chem. 2004;279(10):9625-33. Epub 2003/12/16. doi: 10.1074/jbc.M311933200.  
896 PubMed PMID: 14672932.
- 897 24. Wohlschlegel JA, Dwyer BT, Dhar SK, Cvetic C, Walter JC, Dutta A. Inhibition of  
898 eukaryotic DNA replication by geminin binding to Cdt1. Science.  
899 2000;290(5500):2309-12. doi: 10.1126/science.290.5500.2309. PubMed PMID:  
900 11125146.
- 901 25. Parker MW, Bell M, Mir M, Kao JA, Darzacq X, Botchan MR, et al. A new class of  
902 disordered elements controls DNA replication through initiator self-assembly. eLife.  
903 2019;8. Epub 2019/09/29. doi: 10.7554/eLife.48562. PubMed PMID: 31560342.
- 904 26. Khayrutdinov BI, Bae WJ, Yun YM, Lee JH, Tsuyama T, Kim JJ, et al. Structure of  
905 the Cdt1 C-terminal domain: conservation of the winged helix fold in replication  
906 licensing factors. Protein Sci. 2009;18(11):2252-64. doi: 10.1002/pro.236. PubMed  
907 PMID: 19722278; PubMed Central PMCID: PMCPMC2788280.
- 908 27. Lee C, Hong B, Choi JM, Kim Y, Watanabe S, Ishimi Y, et al. Structural basis for  
909 inhibition of the replication licensing factor Cdt1 by geminin. Nature.  
910 2004;430(7002):913-7. PubMed PMID: 15286659.

- 911 28. Pozo PN, Matson JP, Cole Y, Kedziora KM, Grant GD, Temple B, et al. Cdt1  
912 variants reveal unanticipated aspects of interactions with Cyclin/CDK and MCM  
913 important for normal genome replication. *Mol Biol Cell*. 2018;mbcE18040242. Epub  
914 2018/10/04. doi: 10.1091/mbc.E18-04-0242. PubMed PMID: 30281379; PubMed  
915 Central PMCID: PMC6333176.
- 916 29. Ferenbach A, Li A, Brito-Martins M, Blow JJ. Functional domains of the *Xenopus*  
917 replication licensing factor Cdt1. *Nucleic Acids Res*. 2005;33(1):316-24. Epub  
918 2005/01/18. doi: 10.1093/nar/gki176. PubMed PMID: 15653632; PubMed Central  
919 PMCID: PMC546161.
- 920 30. Teer JK, Dutta A. Human Cdt1 lacking the evolutionarily conserved region that  
921 interacts with MCM2-7 is capable of inducing re-replication. *The Journal of*  
922 *biological chemistry*. 2008;283(11):6817-25. Epub 2008/01/11. doi:  
923 10.1074/jbc.M708767200. PubMed PMID: 18184650.
- 924 31. Zhang J, Yu L, Wu X, Zou L, Sou KK, Wei Z, et al. The interacting domains of  
925 hCdt1 and hMcm6 involved in the chromatin loading of the MCM complex in  
926 human cells. *Cell Cycle*. 2010;9(24):4848-57. Epub 2010/11/26. doi:  
927 10.4161/cc.9.24.14136. PubMed PMID: 21099365.
- 928 32. You Z, Ode KL, Shindo M, Takisawa H, Masai H. Characterization of conserved  
929 arginine residues on Cdt1 that affect licensing activity and interaction with Geminin  
930 or Mcm complex. *Cell Cycle*. 2016;0. doi: 10.1080/15384101.2015.1106652.  
931 PubMed PMID: 26940553.
- 932 33. Vaziri C, Saxena S, Jeon Y, Lee C, Murata K, Machida Y, et al. A p53-dependent  
933 checkpoint pathway prevents rereplication. *Mol Cell*. 2003;11(4):997-1008.  
934 PubMed PMID: 12718885.
- 935 34. Nishitani H, Sugimoto N, Roukos V, Nakanishi Y, Saijo M, Obuse C, et al. Two E3  
936 ubiquitin ligases, SCF-Skp2 and DDB1-Cul4, target human Cdt1 for proteolysis.  
937 *EMBO J*. 2006;25(5):1126-36. Epub 2006/02/17. doi: 10.1038/sj.emboj.7601002.  
938 PubMed PMID: 16482215; PubMed Central PMCID: PMC1409712.
- 939 35. Zhu W, Chen Y, Dutta A. Rereplication by depletion of geminin is seen regardless  
940 of p53 status and activates a G2/M checkpoint. *Mol Cell Biol*. 2004;24(16):7140-50.  
941 Epub 2004/07/30. doi: 10.1128/MCB.24.16.7140-7150.2004. PubMed PMID:  
942 15282313; PubMed Central PMCID: PMC479725.
- 943 36. Melixetian M, Ballabeni A, Masiero L, Gasparini P, Zamponi R, Bartek J, et al. Loss  
944 of Geminin induces rereplication in the presence of functional p53. *J Cell Biol*.  
945 2004;165(4):473-82. PubMed PMID: 15159417.
- 946 37. Klotz-Noack K, McIntosh D, Schurch N, Pratt N, Blow JJ. Re-replication induced by  
947 geminin depletion occurs from G2 and is enhanced by checkpoint activation. *J Cell*  
948 *Sci*. 2012;125(Pt 10):2436-45. doi: 10.1242/jcs.100883. PubMed PMID: 22366459;  
949 PubMed Central PMCID: PMC3481538.
- 950 38. Hornbeck PV, Zhang B, Murray B, Kornhauser JM, Latham V, Skrzypek E.  
951 PhosphoSitePlus, 2014: mutations, PTMs and recalibrations. *Nucleic Acids Res*.  
952 2015;43(Database issue):D512-20. Epub 2014/12/18. doi: 10.1093/nar/gku1267.  
953 PubMed PMID: 25514926; PubMed Central PMCID: PMC4383998.
- 954 39. Sugimoto N, Tatsumi Y, Tsurumi T, Matsukage A, Kiyono T, Nishitani H, et al. Cdt1  
955 phosphorylation by cyclin A-dependent kinases negatively regulates its function  
956 without affecting geminin binding. *J Biol Chem*. 2004;279(19):19691-7. Epub  
957 2004/03/03. doi: 10.1074/jbc.M313175200. PubMed PMID: 14993212.
- 958 40. Takeda DY, Parvin JD, Dutta A. Degradation of Cdt1 during S phase is Skp2-  
959 independent and is required for efficient progression of mammalian cells through S  
960 phase. *J Biol Chem*. 2005;280(24):23416-23. doi: 10.1074/jbc.M501208200.  
961 PubMed PMID: 15855168.

- 962 41. Miotto B, Struhl K. JNK1 phosphorylation of Cdt1 inhibits recruitment of HBO1  
963 histone acetylase and blocks replication licensing in response to stress. *Mol Cell*.  
964 2011;44(1):62-71. Epub 2011/08/23. doi: 10.1016/j.molcel.2011.06.021. PubMed  
965 PMID: 21856198; PubMed Central PMCID: PMC3190045.
- 966 42. Matson JP, Dumitru R, Coryell P, Baxley RM, Chen W, Twaroski K, et al. Rapid  
967 DNA replication origin licensing protects stem cell pluripotency. *eLife*. 2017;6. Epub  
968 2017/11/18. doi: 10.7554/eLife.30473. PubMed PMID: 29148972; PubMed Central  
969 PMCID: PMC5720591.
- 970 43. Haland TW, Boye E, Stokke T, Grallert B, Syljuasen RG. Simultaneous  
971 measurement of passage through the restriction point and MCM loading in single  
972 cells. *Nucleic Acids Res*. 2015. doi: 10.1093/nar/gkv744. PubMed PMID:  
973 26250117.
- 974 44. Kinoshita E, Kinoshita-Kikuta E, Takiyama K, Koike T. Phosphate-binding tag, a  
975 new tool to visualize phosphorylated proteins. *Mol Cell Proteomics*. 2006;5(4):749-  
976 57. Epub 2005/12/13. doi: 10.1074/mcp.T500024-MCP200. PubMed PMID:  
977 16340016.
- 978 45. Higa LA, Mihaylov IS, Banks DP, Zheng J, Zhang H. Radiation-mediated  
979 proteolysis of CDT1 by CUL4-ROC1 and CSN complexes constitutes a new  
980 checkpoint. *Nat Cell Biol*. 2003. PubMed PMID: 14578910.
- 981 46. Higa LA, Banks D, Wu M, Kobayashi R, Sun H, Zhang H. L2DTL/CDT2 interacts  
982 with the CUL4/DDB1 complex and PCNA and regulates CDT1 proteolysis in  
983 response to DNA damage. *Cell Cycle*. 2006;5(15):1675-80. PubMed PMID:  
984 16861906.
- 985 47. Lovejoy CA, Lock K, Yenamandra A, Cortez D. DDB1 maintains genome integrity  
986 through regulation of Cdt1. *Mol Cell Biol*. 2006;26(21):7977-90. PubMed PMID:  
987 16940174.
- 988 48. Hu J, McCall CM, Ohta T, Xiong Y. Targeted ubiquitination of CDT1 by the DDB1-  
989 CUL4A-ROC1 ligase in response to DNA damage. *Nat Cell Biol*. 2004;6(10):1003-  
990 9. PubMed PMID: 15448697.
- 991 49. Hall FL, Vulliet PR. Proline-directed protein phosphorylation and cell cycle  
992 regulation. *Curr Opin Cell Biol*. 1991;3(2):176-84. Epub 1991/04/01. PubMed  
993 PMID: 1831990.
- 994 50. Roux PP, Blenis J. ERK and p38 MAPK-activated protein kinases: a family of  
995 protein kinases with diverse biological functions. *Microbiol Mol Biol Rev*.  
996 2004;68(2):320-44. Epub 2004/06/10. doi: 10.1128/MMBR.68.2.320-344.2004.  
997 PubMed PMID: 15187187; PubMed Central PMCID: PMC419926.
- 998 51. Songyang Z, Lu KP, Kwon YT, Tsai LH, Filhol O, Cochet C, et al. A structural basis  
999 for substrate specificities of protein Ser/Thr kinases: primary sequence preference  
1000 of casein kinases I and II, NIMA, phosphorylase kinase, calmodulin-dependent  
1001 kinase II, CDK5, and Erk1. *Mol Cell Biol*. 1996;16(11):6486-93. Epub 1996/11/01.  
1002 doi: 10.1128/mcb.16.11.6486. PubMed PMID: 8887677; PubMed Central PMCID:  
1003 PMC3190045.
- 1004 52. Echaliier A, Endicott JA, Noble ME. Recent developments in cyclin-dependent  
1005 kinase biochemical and structural studies. *Biochim Biophys Acta*.  
1006 2010;1804(3):511-9. Epub 2009/10/14. doi: 10.1016/j.bbapap.2009.10.002.  
1007 PubMed PMID: 19822225.
- 1008 53. Faust D, Dolado I, Cuadrado A, Oesch F, Weiss C, Nebreda AR, et al. p38alpha  
1009 MAPK is required for contact inhibition. *Oncogene*. 2005;24(53):7941-5. Epub  
1010 2005/07/20. doi: 10.1038/sj.onc.1208948. PubMed PMID: 16027723.
- 1011 54. Swat A, Dolado I, Rojas JM, Nebreda AR. Cell Density-Dependent Inhibition of  
1012 Epidermal Growth Factor Receptor Signaling by p38{alpha} Mitogen-Activated

- 1013 Protein Kinase via Sprout2 Downregulation. *Mol Cell Biol.* 2009;29(12):3332-43.  
1014 doi: 10.1128/mcb.01955-08.
- 1015 55. Cha H, Wang X, Li H, Fornace AJ. A Functional Role for p38 MAPK in Modulating  
1016 Mitotic Transit in the Absence of Stress. *Journal of Biological Chemistry.*  
1017 2007;282(31):22984-92. doi: 10.1074/jbc.M700735200.
- 1018 56. Yaffe MB, Schutkowski M, Shen M, Zhou XZ, Stukenberg PT, Rahfeld JU, et al.  
1019 Sequence-specific and phosphorylation-dependent proline isomerization: a  
1020 potential mitotic regulatory mechanism. *Science.* 1997;278(5345):1957-60. Epub  
1021 1998/01/07. doi: 10.1126/science.278.5345.1957. PubMed PMID: 9395400.
- 1022 57. Mailand N, Diffley JF. CDKs promote DNA replication origin licensing in human  
1023 cells by protecting Cdc6 from APC/C-dependent proteolysis. *Cell.*  
1024 2005;122(6):915-26. doi: 10.1016/j.cell.2005.08.013. PubMed PMID: 16153703.
- 1025 58. Vassilev LT, Tovar C, Chen S, Knezevic D, Zhao X, Sun H, et al. Selective small-  
1026 molecule inhibitor reveals critical mitotic functions of human CDK1. *Proc Natl Acad*  
1027 *Sci U S A.* 2006;103(28):10660-5. Epub 2006/07/05. doi:  
1028 10.1073/pnas.0600447103. PubMed PMID: 16818887; PubMed Central PMCID:  
1029 PMCPMC1502288.
- 1030 59. McGarry TJ, Kirschner MW. Geminin, an inhibitor of DNA replication, is degraded  
1031 during mitosis. *Cell.* 1998;93(6):1043-53. PubMed PMID: 9635433.
- 1032 60. Bollen M, Peti W, Ragusa MJ, Beullens M. The extended PP1 toolkit: designed to  
1033 create specificity. *Trends Biochem Sci.* 2010;35(8):450-8. Epub 2010/04/20. doi:  
1034 10.1016/j.tibs.2010.03.002. PubMed PMID: 20399103; PubMed Central PMCID:  
1035 PMCPMC3131691.
- 1036 61. Swingle M, Ni L, Honkanen RE. Small-molecule inhibitors of ser/thr protein  
1037 phosphatases: specificity, use and common forms of abuse. *Methods Mol Biol.*  
1038 2007;365:23-38. Epub 2007/01/04. doi: 10.1385/1-59745-267-X:23. PubMed  
1039 PMID: 17200551; PubMed Central PMCID: PMCPMC2709456.
- 1040 62. Ishihara H, Martin BL, Brautigan DL, Karaki H, Ozaki H, Kato Y, et al. Calyculin A  
1041 and okadaic acid: inhibitors of protein phosphatase activity. *Biochem Biophys Res*  
1042 *Commun.* 1989;159(3):871-7. Epub 1989/03/31. doi: 10.1016/0006-  
1043 291x(89)92189-x. PubMed PMID: 2539153.
- 1044 63. Hiraga S, Alvino GM, Chang F, Lian HY, Sridhar A, Kubota T, et al. Rif1 controls  
1045 DNA replication by directing Protein Phosphatase 1 to reverse Cdc7-mediated  
1046 phosphorylation of the MCM complex. *Genes Dev.* 2014;28(4):372-83. Epub  
1047 2014/02/18. doi: 10.1101/gad.231258.113. PubMed PMID: 24532715; PubMed  
1048 Central PMCID: PMCPMC3937515.
- 1049 64. Arias EE, Walter JC. Replication-dependent destruction of Cdt1 limits DNA  
1050 replication to a single round per cell cycle in *Xenopus* egg extracts. *Genes Dev.*  
1051 2005;19(1):114-26. PubMed PMID: 15598982.
- 1052 65. Nishitani H, Lygerou Z, Nishimoto T. Proteolysis of DNA replication licensing factor  
1053 Cdt1 in S-phase is performed independently of geminin through its N-terminal  
1054 region. *J Biol Chem.* 2004;279(29):30807-16. Epub 2004/05/13. doi:  
1055 10.1074/jbc.M312644200. PubMed PMID: 15138268.
- 1056 66. Agarwal S, Smith KP, Zhou Y, Suzuki A, McKenney RJ, Varma D. Cdt1 stabilizes  
1057 kinetochore-microtubule attachments via an Aurora B kinase-dependent  
1058 mechanism. *J Cell Biol.* 2018;217(10):3446-63. Epub 2018/08/30. doi:  
1059 10.1083/jcb.201705127. PubMed PMID: 30154187; PubMed Central PMCID:  
1060 PMCPMC6168275.
- 1061 67. Koivomagi M, Valk E, Venta R, Iofik A, Lepiku M, Balog ER, et al. Cascades of  
1062 multisite phosphorylation control Sic1 destruction at the onset of S phase. *Nature.*



- 1063 2011;480(7375):128-31. Epub 2011/10/14. doi: 10.1038/nature10560. PubMed  
1064 PMID: 21993622; PubMed Central PMCID: PMC3228899.
- 1065 68. Geley S, Kramer E, Gieffers C, Gannon J, Peters JM, Hunt T. Anaphase-promoting  
1066 complex/cyclosome-dependent proteolysis of human cyclin A starts at the  
1067 beginning of mitosis and is not subject to the spindle assembly checkpoint. *J Cell*  
1068 *Biol.* 2001;153(1):137-48. Epub 2001/04/04. doi: 10.1083/jcb.153.1.137. PubMed  
1069 PMID: 11285280; PubMed Central PMCID: PMC2185534.
- 1070 69. den Elzen N, Pines J. Cyclin A is destroyed in prometaphase and can delay  
1071 chromosome alignment and anaphase. *J Cell Biol.* 2001;153(1):121-36. Epub  
1072 2001/04/04. doi: 10.1083/jcb.153.1.121. PubMed PMID: 11285279; PubMed  
1073 Central PMCID: PMC2185531.
- 1074 70. Frigola J, He J, Kinkelin K, Pye VE, Renault L, Douglas ME, et al. Cdt1 stabilizes  
1075 an open MCM ring for helicase loading. *Nat Commun.* 2017;8:15720. doi:  
1076 10.1038/ncomms15720. PubMed PMID: 28643783.
- 1077 71. Yuan Z, Riera A, Bai L, Sun J, Nandi S, Spanos C, et al. Structural basis of Mcm2-  
1078 7 replicative helicase loading by ORC-Cdc6 and Cdt1. *Nat Struct Mol Biol.* 2017.  
1079 doi: 10.1038/nsmb.3372. PubMed PMID: 28191893.
- 1080 72. Zhai Y, Cheng E, Wu H, Li N, Yung PY, Gao N, et al. Open-ringed structure of the  
1081 Cdt1-Mcm2-7 complex as a precursor of the MCM double hexamer. *Nat Struct Mol*  
1082 *Biol.* 2017;24(3):300-8. doi: 10.1038/nsmb.3374. PubMed PMID: 28191894.
- 1083 73. Campos CBL, Bédard PA, Linden R. Activation of p38 mitogen-activated protein  
1084 kinase during normal mitosis in the developing retina. *Neuroscience.*  
1085 2002;112(3):583-91.
- 1086 74. Thornton TM, Rincon M. Non-classical p38 map kinase functions: cell cycle  
1087 checkpoints and survival. *Int J Biol Sci.* 2009;5(1):44-51. Epub 2009/01/23.  
1088 PubMed PMID: 19159010; PubMed Central PMCID: PMC2610339.
- 1089 75. Hossain M, Bhalla K, Stillman B. Cyclin binding Cy motifs have multiple activities in  
1090 the initiation of DNA replication. *bioRxiv.* 2019:681668. doi: 10.1101/681668.
- 1091 76. Wakula P, Beullens M, Ceulemans H, Stalmans W, Bollen M. Degeneracy and  
1092 function of the ubiquitous RVXF motif that mediates binding to protein  
1093 phosphatase-1. *J Biol Chem.* 2003;278(21):18817-23. Epub 2003/03/27. doi:  
1094 10.1074/jbc.M300175200. PubMed PMID: 12657641.
- 1095 77. Alver RC, Chadha GS, Gillespie PJ, Blow JJ. Reversal of DDK-Mediated MCM  
1096 Phosphorylation by Rif1-PP1 Regulates Replication Initiation and Replisome  
1097 Stability Independently of ATR/Chk1. *Cell Rep.* 2017;18(10):2508-20. Epub  
1098 2017/03/09. doi: 10.1016/j.celrep.2017.02.042. PubMed PMID: 28273463; PubMed  
1099 Central PMCID: PMC5357733.
- 1100 78. Hiraga SI, Ly T, Garzon J, Horejsi Z, Ohkubo YN, Endo A, et al. Human RIF1 and  
1101 protein phosphatase 1 stimulate DNA replication origin licensing but suppress  
1102 origin activation. *EMBO Rep.* 2017;18(3):403-19. Epub 2017/01/13. doi:  
1103 10.15252/embr.201641983. PubMed PMID: 28077461; PubMed Central PMCID:  
1104 PMC5331243.
- 1105 79. Arias EE, Walter JC. PCNA functions as a molecular platform to trigger Cdt1  
1106 destruction and prevent re-replication. *Nat Cell Biol.* 2006;8(1):84-90. doi:  
1107 10.1038/ncb1346. PubMed PMID: 16362051.
- 1108 80. Nguyen VQ, Co C, Li JJ. Cyclin-dependent kinases prevent DNA re-replication  
1109 through multiple mechanisms. *Nature.* 2001;411(6841):1068-73. Epub 2001/06/29.  
1110 doi: 10.1038/35082600. PubMed PMID: 11429609.
- 1111 81. Tardat M, Brustel J, Kirsh O, Lefevbre C, Callanan M, Sardet C, et al. The histone  
1112 H4 Lys 20 methyltransferase PR-Set7 regulates replication origins in mammalian

- 1113 cells. *Nat Cell Biol.* 2010;12(11):1086-93. Epub 2010/10/19. doi: 10.1038/ncb2113.  
1114 PubMed PMID: 20953199.
- 1115 82. Malecki MJ, Sanchez-Irizarry C, Mitchell JL, Histen G, Xu ML, Aster JC, et al.  
1116 Leukemia-associated mutations within the NOTCH1 heterodimerization domain fall  
1117 into at least two distinct mechanistic classes. *Mol Cell Biol.* 2006;26(12):4642-51.  
1118 doi: 10.1128/MCB.01655-05. PubMed PMID: 16738328; PubMed Central PMCID:  
1119 PMC1489116.
- 1120 83. White AE, Burch BD, Yang XC, Gasdaska PY, Dominski Z, Marzluff WF, et al.  
1121 *Drosophila* histone locus bodies form by hierarchical recruitment of components. *J*  
1122 *Cell Biol.* 2011;193(4):677-94. Epub 2011/05/18. doi: 10.1083/jcb.201012077.  
1123 PubMed PMID: 21576393; PubMed Central PMCID: PMC3166876.
- 1124 84. Stokoe D, Campbell DG, Nakielny S, Hidaka H, Leever SJ, Marshall C, et al.  
1125 MAPKAP kinase-2; a novel protein kinase activated by mitogen-activated protein  
1126 kinase. *The EMBO journal.* 1992;11(11):3985-94. Epub 1992/11/01. PubMed  
1127 PMID: 1327754; PubMed Central PMCID: PMC556909.  
1128

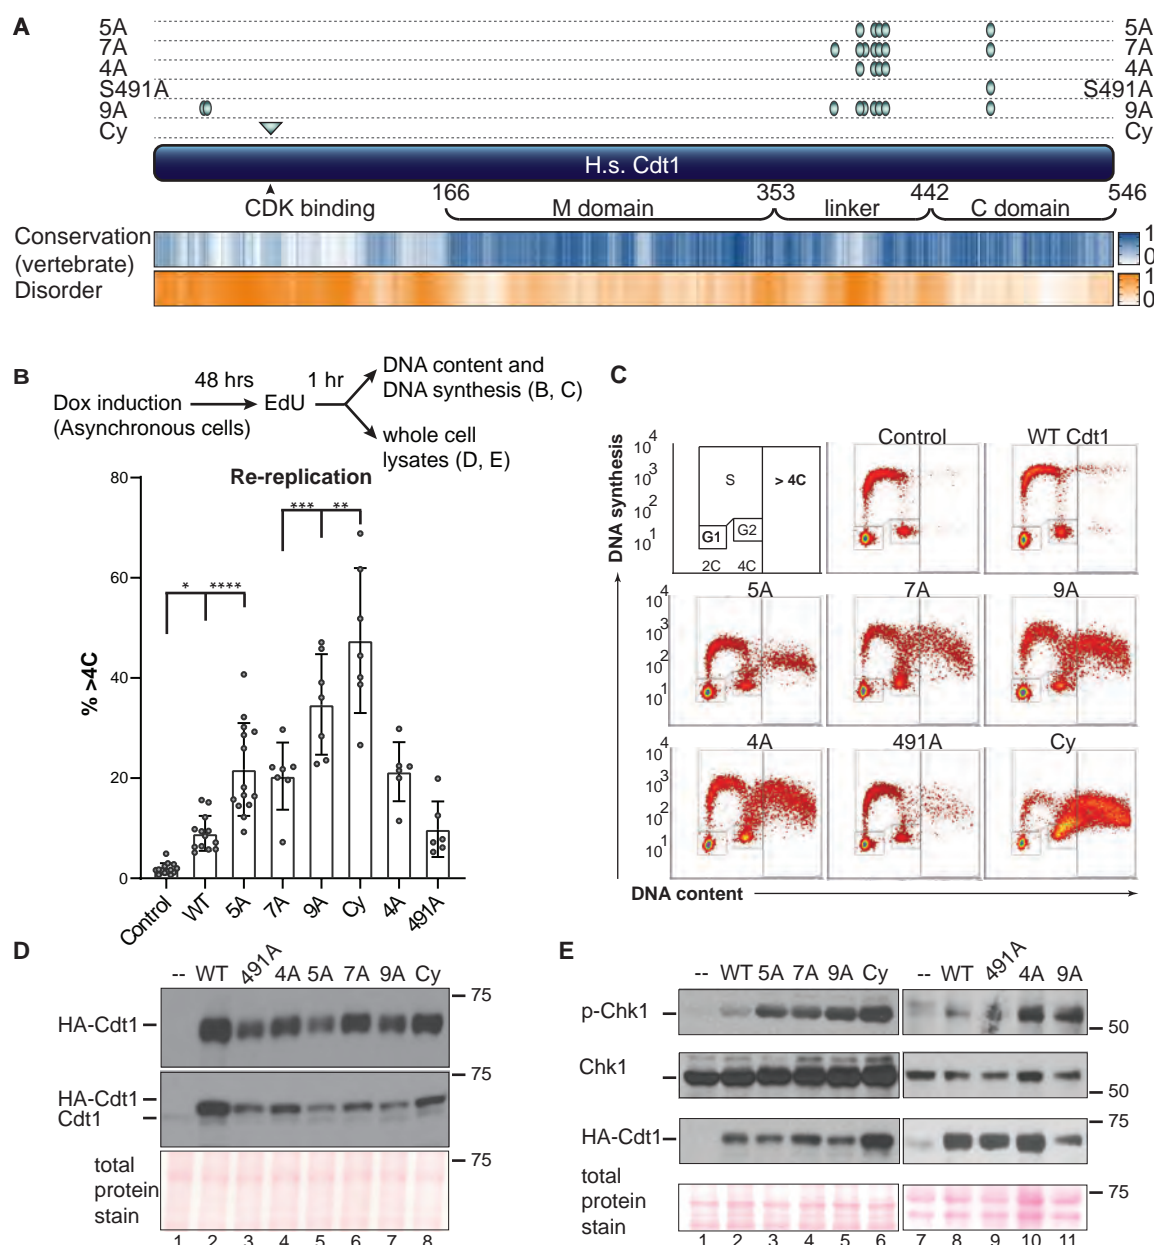

**Figure 1. Cdt1 phosphorylation restrains re-replication.**

**A**) Schematic of the human Cdt1 protein illustrating features and variants relevant to this study. Cdt1 contains two structurally-characterized domains, the Geminin and MCM binding domain (M) and a C-terminal MCM binding domain (C). The Ser/Thr-Pro sites that were altered for this study are marked with green ovals, and the cyclin binding motif is marked with a green triangle. Positions are T29, S31, S372, S391, S394, T402, T406, S411, and S491; the cyclin binding motif (Cy) is 68-70. Human Cdt1 was aligned with 26 other vertebrate Cdt1 sequences using ClustalW, and a relative conservation score was derived (see also Methods and Supplementary Fig. S1). The blue heatmap indicates relative conservation at each amino acid position of human Cdt1. An intrinsic disorder score was also derived for human Cdt1 and shown as the corresponding orange heatmap. Darker shades indicate greater conservation or disorder respectively.

**B**) Asynchronously-growing U2OS cells with the indicated chromosomally-integrated inducible Cdt1 constructs were treated with 1  $\mu$ g/mL doxycycline for 48 hours and labeled with EdU for 1 hour before harvesting. Cells were analyzed by flow cytometry for DNA content with DAPI and for DNA synthesis by EdU detection; the workflow is illustrated at the top. The bar graph plots the percentages of re-replicating cells across all experiments. Bars report mean and standard deviations. Asterisks indicate statistical significance determined by one-way ANOVA (\* $p=0.0175$ , \*\* $p=0.0023$ , \*\*\* $p=0.007$ , \*\*\*\* $p<0.0001$ ); 5A vs 7A, 5A vs 4A and WT vs 491A were not significant as defined by  $p>0.05$ .

**C**) One representative of the multiple independent biological replicates summarized in B is shown.

**D**) Whole cell lysates as in B were subjected to immunoblotting for ectopic (HA) or endogenous and ectopic Cdt1; Ponceau S staining of total protein serves as a loading control.

**E**) Asynchronously-growing U2OS cells were treated with 1  $\mu$ g/mL doxycycline for 48 hours, and whole cell lysates were probed for phospho-Chk1 (S345), total Chk1, HA-Cdt1, and total protein; one example of at least two independent experiments is shown.

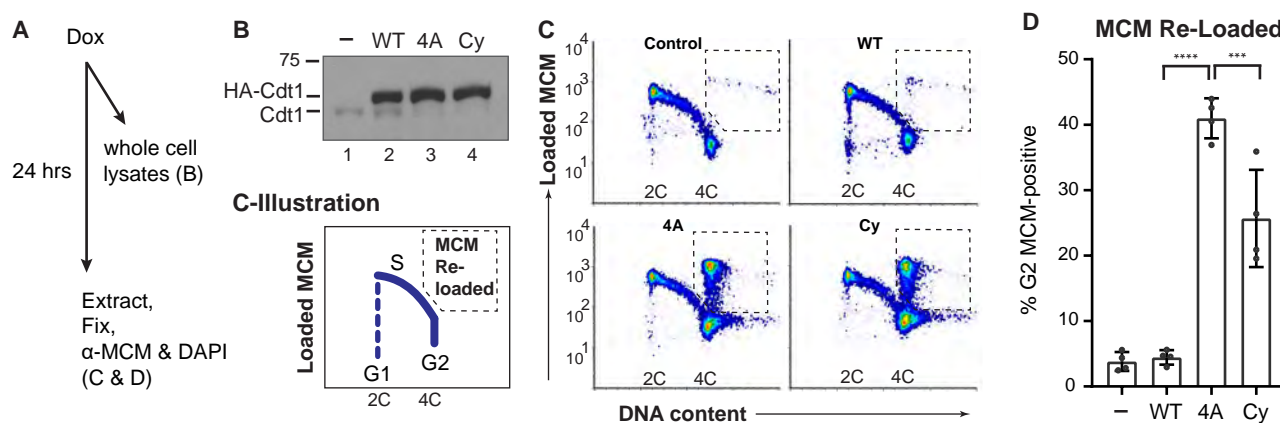

**Figure 2. Cdt1 phosphorylation prevents MCM re-loading in G2 cells.**

**A)** Workflow: Asynchronously proliferating U2OS cells with inducible Cdt1 were treated with 0.05  $\mu$ g/ml doxycycline then subjected to immunoblotting in B or analytical flow cytometry in C and D.

**B)** Immunoblot analysis of initial Cdt1 expression 6 hrs after dox induction. Lysates were probed with anti-Cdt1 to detect both endogenous and ectopic Cdt1.

**C)** Flow cytometry analysis of MCM loading 24 hrs after ectopic Cdt1 induction. Cells were detergent-extracted prior to fixation to remove unbound MCM, then stained for DNA content with DAPI (x-axes) and with anti-MCM2 as a marker of loaded MCM complexes (y-axes). One representative of multiple independent biological replicates is shown, and the illustration depicts typical positions of proliferating cells in G1, S, and G2 phase. The dashed boxes show the gates to quantify MCM re-loading in late S/G2 cells.

**D)** Quantification of four independent replicates as in C. The bars report mean and standard deviations. Asterisks indicate statistical significance determined by one-way ANOVA (\*\*\* $p$ = 0.0002, \*\*\*\*  $p$ <0.0001); Control vs WT was not significant as defined by  $p$ >0.05.

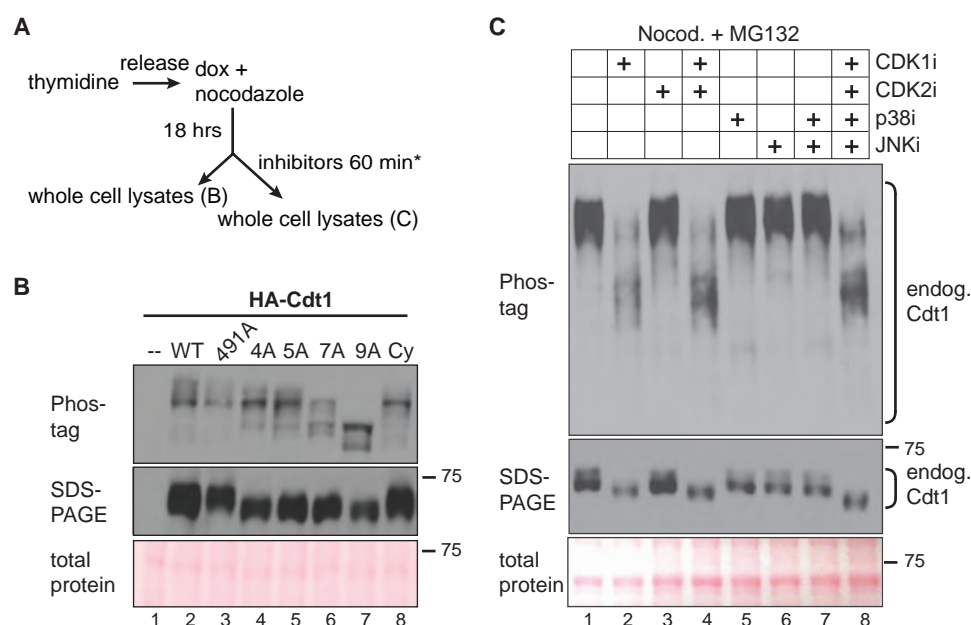

**Figure 3. Cdt1 hyperphosphorylation is dependent on linker sites and CDK1 activity.**

**A)** Workflow for cell line synchronization and inhibitor treatment.

**B)** Whole cell lysates were separated by Phos-tag SDS-PAGE (top) or standard SDS-PAGE (middle) followed by immunoblotting for ectopic Cdt1 (HA); total protein stain serves as a loading control.

**C)** Cells were synchronized with nocodazole as in A, then mock treated or treated with 10  $\mu$ M RO-3306 (lane 2), 6  $\mu$ M CVT313 (lane 4), 30  $\mu$ M SB203580 (lane 5), 10  $\mu$ M JNK inhibitor VIII (lane 6), or combinations of inhibitors as indicated for 1 hour except that RO3306 treatment was for only the final 15 minutes to preserve mitotic cell morphology. All cells were simultaneously treated with 20  $\mu$ M MG132 to prevent premature mitotic exit. Endogenous Cdt1 phosphorylation was assessed by standard or Phos-tag SDS-PAGE followed by immunoblotting; total protein stain serves as a loading control. The example shown is representative of more than three independent experiments.

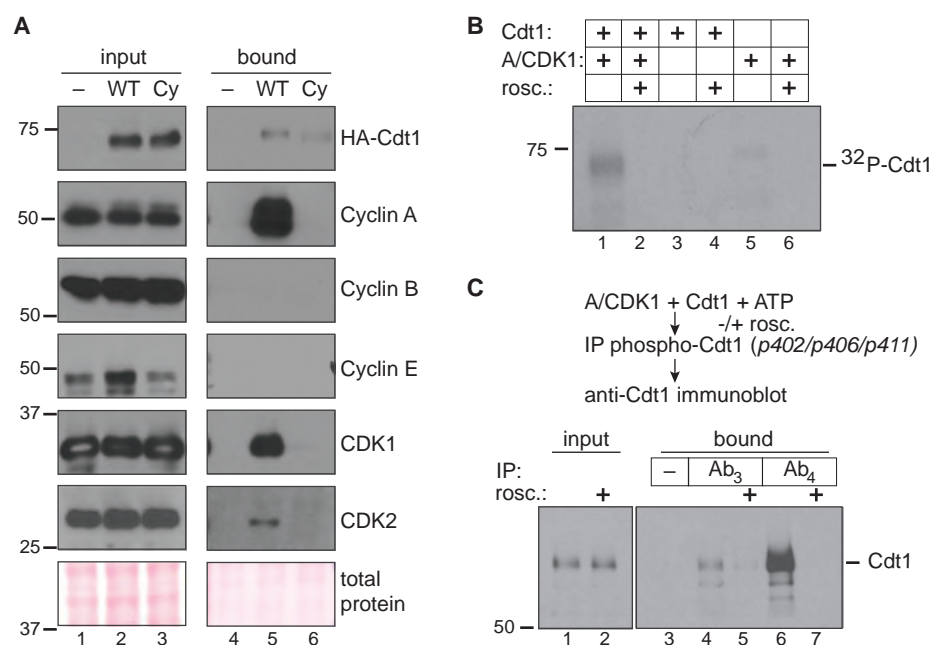

**Figure 4. Cyclin A/CDK1 phosphorylates Cdt1 linker sites.**

**A)** HEK 293T cells were transfected with control plasmid or plasmid producing His-tagged Cdt1-WT or a Cdt1-variant that cannot bind CDKs (Cdt1-Cy) then synchronized with nocodazole and harvested by mitotic shake off. Cdt1 was retrieved on nickel-agarose, and the indicated endogenous proteins were detected in whole cell lysates (lanes 1-3) and bound fractions (lanes 4-6) by immunoblotting. The result is representative of at least two independent experiments.

**B)** Recombinant partially-purified Cdt1 was incubated with purified Cyclin A/CDK1 in the presence of <sup>32</sup>P-γ-ATP in kinase buffer for one hour at 30°C. Control reactions contained Cdt1 only, kinase only, or were complete reactions in the presence of 20 μM roscovitine (CDK inhibitor) as indicated. Reactions were separated by SDS-PAGE followed by autoradiography.

**C)** Recombinant Cdt1 was incubated with purified Cyclin A/CDK1 in the presence of unlabeled ATP as in B; roscovitine was included as indicated. Reactions were subjected to immunoprecipitation with either pre-immune serum or immune sera to retrieve Cdt1 phosphorylated at S402, S406, and T411; Ab<sub>3</sub> and Ab<sub>4</sub> are consecutive test bleeds from the immunized rabbit. Both input and bound proteins were probed for total Cdt1 by immunoblotting.

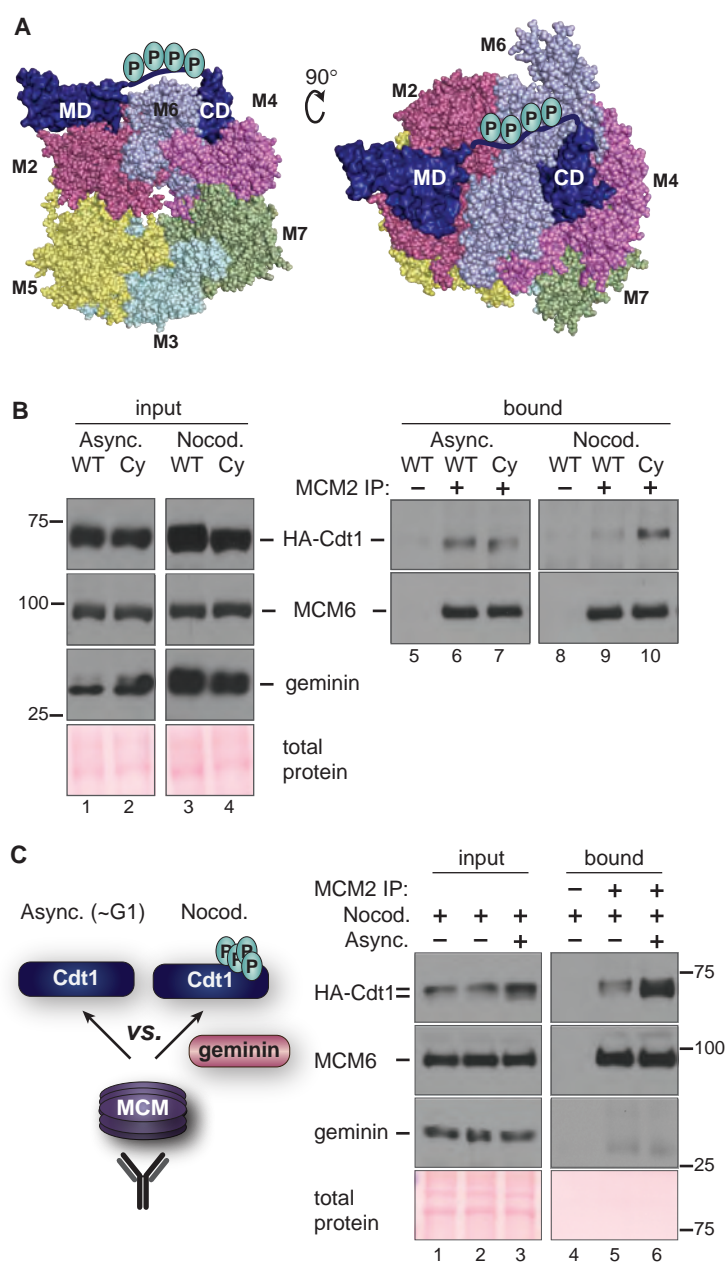

**Figure 5. Hyperphosphorylation impairs Cdt1-MCM binding.**

**A)** Two views of a homology model of the human MCM<sub>2-7</sub>-Cdt1 complex as described in Pozo *et al.* 2018; numbers refer to individual MCM subunits. The disordered linker containing phosphorylation sites is hand-drawn connecting the two structured domains (MD and CD) in the model.

**B)** Asynchronously growing or nocodazole-arrested HEK293T cells ectopically expressing HA-tagged Cdt1-WT or the Cdt1-C variant were lysed and subjected to immunoprecipitation with anti-MCM2 antibody. Whole cell lysates (lanes 1-4) and bound proteins (lanes 5-10) were probed for HA, MCM6 and Geminin, respectively; total protein stain serves as a loading control. TI results are representative of two independent experiments.

**C)** A lysate of nocodazole-arrested (Cdt1 hyperphosphorylated, Geminin-expressing) U2OS cells producing HA-tagged Cdt1 was mixed with lysate from the same cells growing asynchronously as indicated. Asynchronous cells contain mostly hypophosphorylated Cdt1 and very little Geminin. These lysates were then subjected to immunoprecipitation with anti-MCM2 antibody and probed for bound Cdt1. Input lysates (lanes 1-3) and bound proteins (lanes 4-6) were probed for HA-Cdt1, MCM (a marker of the MCM complex), and Geminin. The example shown is representative of three independent experiments.

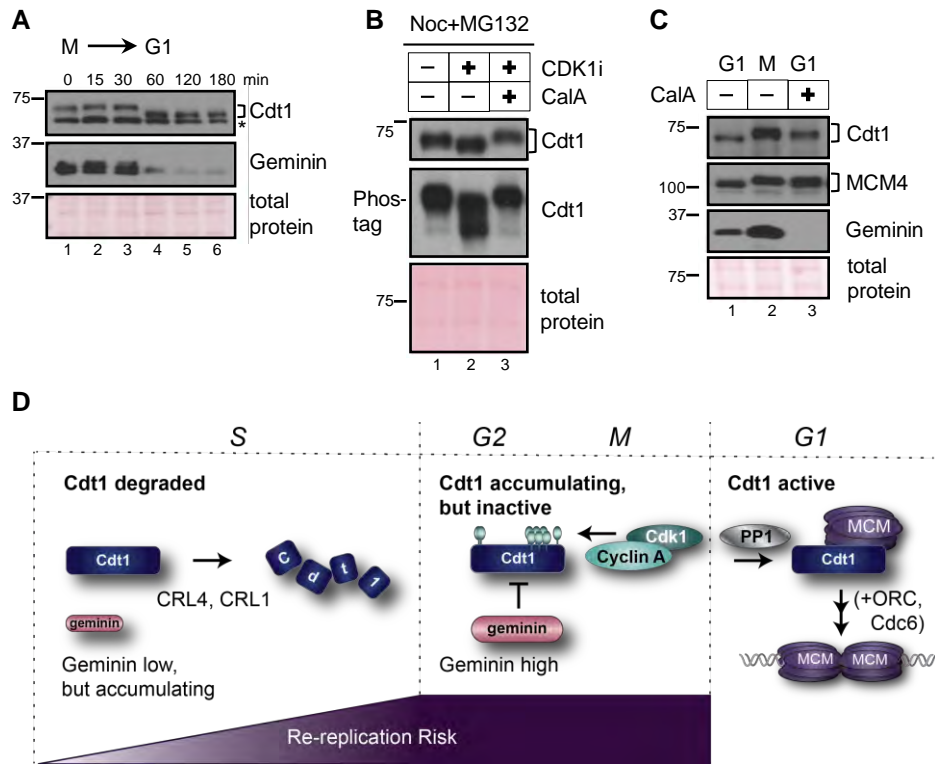

**Figure 6. Cdt1 dephosphorylation at the M-G1 transition requires PP1.**

**A)** Nocodazole-arrested U2OS cells were released into fresh medium and collected at the indicated time points. Endogenous Cdt1 phosphorylation (top) and Geminin (middle) degradation were analyzed by immunoblotting; Ponceau S staining for total protein and a non-specific band (\*) serve as loading controls. The results are representative of two independent experiments.

**B)** Nocodazole-arrested U2OS cells were mock treated (lane 1) or treated with 10  $\mu$ M RO-3306 (CDK1i, lane 2), or treated with both 10  $\mu$ M RO-3306 and with 20 nM calyculin A as indicated (CalA, lane 3). Endogenous Cdt1 phosphorylation was analyzed by standard or Phos-tag SDS-PAGE followed by immunoblotting; total protein stain serves as a loading control. The results are representative of three independent experiments.

**C)** Nocodazole-arrested U2OS cells (lane 2) were released into fresh medium for 3 hours and mock treated (lane 1) or treated with 20 nM calyculin A 30 minutes after release (lane 3). Endogenous Cdt1 or MCM4 phosphorylation and total Geminin were detected by immunoblotting; total protein stain serves as a loading control. The results are representative of three independent experiments.

**D)** Model. In S phase Cdt1 is targeted for degradation, first by the CRL4<sup>Cdt2</sup> E3 ubiquitin ligase at the onset of S phase and then additionally by SCF<sup>Skp2</sup> after phosphorylation by Cyclin A/CDK2. Geminin accumulates starting in early S phase. The amount of duplicated DNA at risk of re-replication is lowest in early S and highest in G2. In late S and G2 phase Cdt1 re-accumulates and Geminin is at high levels. Cyclin A/CDK1 phosphorylates Cdt1, and both Geminin and Cdt1 hyperphosphorylation independently block Cdt1-MCM binding. At the M→G1 transition Protein Phosphatase 1 is required for Cdt1 dephosphorylation to reactivate MCM loading by Cdt1, ORC, and Cdc6.
